# Supplementary material for: Exploring non-coding variants and evaluation of antisense oligonucleotides for splicing redirection in Usher syndrome
Source: PubMed Central journal article supplement (PMC11612772; doi:10.1016/j.omtn.2024.102374), 2024-10-28
Supplement: mmc2.pdf [file mmc2.pdf]

# Exploring non-coding variants and evaluation of antisense oligonucleotides for splicing redirection in Usher syndrome

Belén García-Bohórquez,<sup>1,2,3</sup> Pilar Barberán-Martínez,<sup>1,3</sup> Elena Aller,<sup>1,2,3,4</sup> Teresa Jaijo,<sup>1,2,3,4</sup> Pablo Mínguez,<sup>2,5,6</sup> Cristina Rodilla,<sup>2,5</sup> Lidia Fernández-Caballero,<sup>2,5</sup> Fiona Blanco-Kelly,<sup>2,5</sup> Carmen Ayuso,<sup>2,5</sup> Alba Sanchis-Juan,<sup>7,8,9</sup> Sanne Broekman,<sup>10</sup> Erik de Vrieze,<sup>10</sup> Erwin van Wijk,<sup>10</sup> Gema García-García,<sup>1,2,3,11</sup> and José M. Millán<sup>1,2,3,4,11</sup>

<sup>1</sup>Molecular, Cellular and Genomics Biomedicine, Health Research Institute La Fe, 46026 Valencia, Spain; <sup>2</sup>Center for Biomedical Network Research on Rare Diseases (CIBERER), Instituto de Salud Carlos III, 28029 Madrid, Spain; <sup>3</sup>Joint Unit CIPF-IIS La Fe Molecular, Cellular and Genomic Biomedicine, 46026 Valencia, Spain; <sup>4</sup>University and Polytechnic La Fe Hospital of Valencia, 46026 Valencia, Spain; <sup>5</sup>Department of Genetics & Genomics, Instituto de Investigación Sanitaria-Fundación Jiménez Díaz University Hospital, Universidad Autónoma de Madrid (IIS-FJD, UAM), 28040 Madrid, Spain; <sup>6</sup>Bioinformatics Unit, Instituto de Investigación Sanitaria-Fundación Jiménez Díaz University Hospital, Universidad Autónoma de Madrid (IIS-FJD, UAM), 28040 Madrid, Spain; <sup>7</sup>Center for Genomic Medicine, Massachusetts General Hospital, Boston, MA, USA; <sup>8</sup>Program in Medical and Population Genetics and Stanley Center for Psychiatric Research, Broad Institute of MIT and Harvard, Cambridge, MA, USA; <sup>9</sup>Department of Neurology, Massachusetts General Hospital and Harvard Medical School, Boston, MA, USA; <sup>10</sup>Department of Otorhinolaryngology, Radboud University Medical Center, 6525 GA Nijmegen, the Netherlands

**Exploring non-coding regions is increasingly gaining importance in the diagnosis of inherited retinal dystrophies. Deep-intronic variants causing aberrant splicing have been identified, prompting the development of antisense oligonucleotides (ASOs) to modulate splicing. We performed a screening of five previously described *USH2A* deep-intronic variants among *USH2A* monoallelic patients with Usher syndrome (USH) or isolated retinitis pigmentosa. Sequencing of entire *USH2A* or *USH* genes was then conducted in unresolved or newly monoallelic cases. The splicing impact of identified variants was assessed using minigene assays, and ASOs were designed to correct splicing. The screening allowed to diagnose 30.95% of the studied patients. The sequencing of *USH* genes revealed 16 new variants predicted to affect splicing, with four confirmed to affect splicing through minigene assays. Two of them were unreported deep-intronic variants and predicted to include a pseudoexon in the pre-mRNA, and the other two could alter a regulatory *cis*-element. ASOs designed for three *USH2A* deep-intronic variants successfully redirected splicing *in vitro*. Our study demonstrates the improvement in genetic characterization of IRDs when analyzing non-coding regions, highlighting that deep-intronic variants significantly contribute to *USH2A* pathogenicity. Furthermore, successful splicing modulation through ASOs highlights their therapeutic potential for patients carrying deep-intronic variants.**

## INTRODUCTION

Inherited retinal dystrophies (IRDs) are a group of rare disorders characterized by the progressive degeneration of the retina due to generally progressive photoreceptor or retinal pigment epithelium cell death. Although IRDs are considered rare diseases, they can

account for 20%–25% of the blind working-age population, with 2 million people affected worldwide.<sup>1</sup> IRDs are characterized by a high clinical and genetic heterogeneity, since pathogenic variants in 289 genes have been described to be causative (<https://web.sph.uth.edu/RetNet/home.htm>, accessed June 2, 2024), and each clinical entity can display different levels of progression and severity of the associated clinical symptoms. Within IRDs, retinitis pigmentosa (RP) is the most frequent IRD with a prevalence of 1/4,000 worldwide,<sup>2</sup> and is caused by the initial degeneration of rods, followed by cone dysfunction and degeneration in advanced stages of the disease.

Besides being manifested as non-syndromic disorders, IRDs can also present as syndromic conditions, in which, besides visual impairment, also other clinical symptoms become apparent. Pathogenic variants in more than 200 different genes have been identified to be associated with syndromic forms of IRD.<sup>3</sup> Particularly, RP can be associated with sensorineural hearing loss and balance impairments, known as Usher syndrome (USH). This syndrome explains more than 50% of hereditary deaf-blindness cases with a prevalence ranging from 4 to 17 individuals per 100,000.<sup>4–6</sup> Typically, USH is classified into 3 types depending on the progression and severity of the symptoms and the age of onset. So far, pathogenic variants in 10 genes are

Received 11 July 2024; accepted 24 October 2024;  
<https://doi.org/10.1016/j.omtn.2024.102374>.

<sup>11</sup>Senior author

**Correspondence:** Gema García-García, Molecular, Cellular and Genomics Biomedicine, Health Research Institute La Fe, 46026 Valencia, Spain.

**E-mail:** [gema\\_garcia@iislafe.es](mailto:gema_garcia@iislafe.es)

**Correspondence:** José M. Millán, Molecular, Cellular and Genomics Biomedicine, Health Research Institute La Fe, 46026 Valencia, Spain.

**E-mail:** [jose\\_millan@iislafe.es](mailto:jose_millan@iislafe.es)

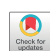

known to underlie USH (*USH1C*, *MYO7A*, *PCDH15*, *CDH23*, *USH1G*, *CIB2*, *USH2A*, *ADGRV1*, *WHRN*, and *CLRN1*), although *CIB2* has been questioned as an USH-associated gene.<sup>7</sup> Recently, a new USH clinical type, named USH4, has been defined and it is related to mutations in the *ARSG* gene.<sup>8–13</sup> In addition, other genes have been reported to be associated in deafness-blindness syndromes similar to USH (*CEP78*, *CEP250*), as *USH2A*-phenotype modifiers (*PDZD7*), or result in a typical form of digenic inheritance with *ADGRV1* variants.<sup>14–17</sup> Among all the USH genes, pathogenic variants in *USH2A* are the most prevalent, explaining 80%–90% of USH2 cases,<sup>18–21</sup> and also the major cause of non-syndromic RP (nsRP) cases (RP39).<sup>21,22</sup>

Traditionally, the study of coding regions through a panel of genes or whole-exome sequencing (WES) has provided a diagnosis percentage of around 60% for IRD cases.<sup>23,24</sup> Therefore, to achieve the complete characterization for those cases apparently monoallelic for pathogenic variants in recessive genes or not solved is a current goal in genetic diagnosis. In recent years, the analysis of non-coding regions of the genome has allowed to widen the range of variant types with a pathogenic effect that can be identified, thus emphasizing the importance of considering these regions for patient diagnosis.<sup>25–27</sup>

In this line, it is well known that deep-intronic variants are disease causing in IRDs.<sup>28–32</sup> These variants promote the inclusion of a pseudoexon (PE) in the mRNA that leads to a truncated protein.<sup>25,33–38</sup> Remarkably, the deep-intronic variant c.7595-2144A>G in *USH2A* has been reported to be recurrent as it may derive from a common ancestor, similar to the two most common variants in this gene, c.2276G>T and c.2299delG.<sup>33,39,40</sup>

Since many deep-intronic variants have been described as being pathogenic, antisense oligonucleotides (ASOs) have been introduced as promising future therapeutic molecules to correct aberrant pre-mRNA splicing.<sup>25,40</sup> In addition, ASOs have been designed to induce the targeted in-frame skipping of (combinations of) frequently mutated exons.<sup>41,42</sup> The first ASO, QR-421a/ultevursen, designed to induce the skipping of *USH2A* exon 13, has already reached the clinical phase with promising outcomes.

In this study, we performed a targeted screening of previously published deep-intronic *USH2A* variants in 42 clinically defined USH/nsRP patients, who were carriers of a single pathogenic variant in the *USH2A* gene. Subsequently, we studied the whole-genomic sequence of *USH2A* and/or all USH genes through a custom panel in monoallelic USH patients. Eventually, ASOs were designed to correct aberrant splicing caused by three identified deep-intronic variants that were shown to result in the inclusion of a PE. Assessment of the splicing redirection potential of the individual ASOs supported their therapeutic potential.

## RESULTS

Screening of 5 reported deep-intronic variants by Sanger sequencing in 41 patients harboring a monoallelic *USH2A* variant completed the

genetic diagnosis of 13 patients (30.95%) (Table 1). Variant c.7595-2144A>G was identified in 8 individuals (RP-1741 carried the c.9959-4159A>G and c.7595-2144A>G variants in heterozygosity). Variant c.14134-3169A>G was identified to be present in 3 patients and the variant c.9959-4159A>G was identified in 2 additional individuals.

Then, 27 patients with a monoallelic (likely) pathogenic variant in a USH gene were selected for targeted genome sequencing of all reported USH genes through a first custom panel (P1) containing the entire sequence of 13 USH genes and 2,000 flanking bases of their UTR sequences (Table S1). Subsequently, a second custom panel (P2) that included all the genomic sequence of *USH2A* gene was sequenced in 6 monoallelic *USH2A* patients (Table S1). The majority (97%) of the bases was sequenced with a depth coverage of  $\geq 20\times$  in both panel designs. Around 8,000 variants per patient were identified by P1 and 2,500 by P2. The sequencing of P1 allowed us to solve 3 cases and the genetic diagnosis was completed in a fourth case by the analysis of P2.

As a validation of the pipeline and filters applied for the analysis, and described in the materials and methods, the two previously detected deep-intronic variants c.9959-4159A>G and c.7595-2144A>G present in the RP-1741 case were correctly identified.

From the 32 monoallelic analyzed cases, we selected a total of 16 variants with pathogenic scores according to splicing prediction tools and the cutoffs defined in materials and methods: 12 in *USH2A*, 1 in *CDH23*, 1 in *ADGRV1*, and 2 in *USH1C* (Table 2). Out of the 16 variants predicted to affect splicing, 11 deep-intronic variants, 2 intronic variants in close vicinity of an exon, and 4 exonic variants were identified (Table 2). The effect of the selected variants on splicing was studied using minigene splice assays and aberrant splicing was observed in 4 out of 16 variants (Table 2): 2 deep-intronic variants in *USH2A* (c.8681+3960A>G and c.9958+3438A>G), 1 intronic variant upstream of *USH2A* exon 26 (c.5168-26A>C), and 1 variant in *USH2A* exon 19 (c.4106C>T) (Figure 1). Among the 16 variants analyzed using minigene splice assays, variant c.1234G>A in the *USH1C* gene of patient RP-1222 was classified as a variant of unknown significance when it was identified in previous studies. Nonetheless, as a potential splicing effect was predicted by Splice AI (score: 0.31) in this study, we decided to select it for functional assay. However, the minigene analysis for this variant did not show any aberrant effect in splicing. All products shown in Figure 1 were confirmed by Sanger sequencing.

Concerning the copy-number variation (CNV) analysis, four rearrangements were identified (Table 3) and two of them were validated using a second technique: one 6.2 kb duplication in *USH2A* in patient RP-2159 by multiplex ligation-dependent probe amplification (MLPA) and one 2.5 kb duplication in *CDH23* in patient RP-681 by CytoScan HD array. The 2.4 kb deletion in *ADGRV1* and the 5 kb deletion in *MYO7A* in patients RP-1496 and RP-2213, respectively, turned out to be false positive as results from qPCR showed no alteration in the copy number.

**Table 1. Reported *USH2A* deep-intronic variants detected by Sanger sequencing in the cohort**

| Patient  | Family  | Dx          | Gene         | Allele 1                            | Sanger screening | Reference                                                        |
|----------|---------|-------------|--------------|-------------------------------------|------------------|------------------------------------------------------------------|
| RP-331   | –       | ARRP        | <i>USH2A</i> | c.2276G>T; p.(Cys759Phe)            | c.7595-2144A>G   | Dreyer et al. <sup>43</sup><br>Vaché et al. <sup>33</sup>        |
| RP-654   | FRP-30  | USH         | <i>USH2A</i> | c.11146C>T; p.(Gln3716*)            | c.7595-2144A>G   | Vaché et al. <sup>33</sup>                                       |
| RP-1647  | FRP-417 | ARRP        | <i>USH2A</i> | c.2276G>T; p.(Cys759Phe)            | c.7595-2144A>G   | Dreyer et al. <sup>43</sup><br>Vaché et al. <sup>33</sup>        |
| RP-1569  | FRP-380 | USH         | <i>USH2A</i> | c.2299del; p.(Glu767Serfs*21)       | c.7595-2144A>G   | Eudy et al. <sup>44</sup><br>Vaché et al. <sup>33</sup>          |
| RP-1595  | FRP-389 | USH         | <i>USH2A</i> | c.10636G>A; p.(Gly3546Arg)          | c.7595-2144A>G   | Vaché et al. <sup>33</sup>                                       |
| RP-1596  |         |             |              | c.10636G>A; p.(Gly3546Arg)          | c.7595-2144A>G   | Garcia-Garcia et al. <sup>45</sup>                               |
| RP-1776  | FRP-484 | ARRP + SNHL | <i>USH2A</i> | c.2276G>T; p.(Cys759Phe)            | c.7595-2144A>G   | Vaché et al. <sup>33</sup><br>Garcia-Garcia et al. <sup>45</sup> |
| RP-2055  | FRP-619 | USH         | <i>USH2A</i> | c.8435_8438del; p.(Thr2812Metfs*17) | c.7595-2144A>G   | Aller et al. <sup>46</sup><br>Vaché et al. <sup>33</sup>         |
| RP-1741# | FRP-460 | USH         | <i>USH2A</i> | c.7595-2144A>G; p.(Lys2532Thrfs*56) | c.9959-4159A>G   | Vaché et al. <sup>33</sup><br>Liquori et al. <sup>34</sup>       |
| RP-1485  | FRP-344 | USH         | <i>USH2A</i> | c.1214del; p.(Asn405Ilefs*3)        | c.9959-4159A>G   | Bernal et al. <sup>47</sup><br>Liquori et al. <sup>34</sup>      |
| RP-1472  | FRP-341 | USH         | <i>USH2A</i> | c.2299del; p.(Glu767Serfs*21)       | c.14134-3169A>G  | Eudy et al. <sup>44</sup><br>Baux et al. <sup>35</sup>           |
| RP-1494  | FRP-348 | USH         | <i>USH2A</i> | c.2299del; p.(Glu767Serfs*21)       | c.14134-3169A>G  | Eudy et al. <sup>44</sup><br>Baux et al. <sup>35</sup>           |
| RP-2224  | FRP-722 | USH         | <i>USH2A</i> | c.2431_2432del; p.(Lys811Aspfs*11)  | c.14134-3169A>G  | Nájera et al. <sup>48</sup><br>Baux et al. <sup>35</sup>         |

RP/RPN, patient number; FRP/FRPN, family number; Dx, diagnosis; ARRP, autosomal recessive retinitis pigmentosa; USH, Usher syndrome; SNHL, sensorineural hearing loss. “#” Refers to the NGS positive control.

In summary, after these combined studies, a total of 19 index cases were completely characterized, 18 of them having a previous pathogenic variant identified in *USH2A* and one in *CDH23*.

#### ***USH2A*: c.4106C>T**

This study allowed us to re-evaluate the pathogenic effect for the variant c.4106C>T, identified in patient RP-1950 monoallelic for the c.2299del (p.Glu767Serfs\*21) variant. A score of 0.31 from SpliceAI predicted a splice acceptor loss, supported also by SpiP with a risk of 54% of altering an exonic splicing regulatory element (rank from 45.68% to 62.16%). Assessment of this variant in a minigene splice assay showed that this variant resulted in the (partial) skipping of exon 19 (Figure 1A). In Figure 1A, fragment 1 corresponds to the wild-type situation, whereas fragment 2 represents a partial skipping of exon 19 as the first 27 nucleotides are missing since an alternative splice acceptor/donor site was used. This event is in frame and no premature stop codon was predicted. Fragment 3 shows the complete skipping of exon 19, where only constitutive plasmid exons are included in the cDNA. This event is predicted to create a stop codon 17 nucleotides downstream of the variant and could generate a truncating protein. However, premature termination codons in USH genes are more likely to cause loss of transcripts

due to nonsense-mediated decay. Fragment 1 corresponds to approximately 32.8% of total transcript count, while fragments 2 and 3 account for 67.2%. Segregation analysis demonstrated that variant c.4106C>T was in *trans* with mutation c.2299del, thus it co-segregates with the disease (Figure S1).

#### ***USH2A*: c.5168-26A>C**

Variant c.5168-26A>C, which flanks exon 26 of *USH2A*, was identified in patient RP-2034. This patient presented a clinical USH2 diagnosis and was monoallelic for the *USH2A* c.2299del (p.Glu767Serfs\*21) variant. The prediction score from SpliceAI suggested a splice acceptor loss (0.55), while SpiP showed a potential branch-point alteration with a score of 43.04% (35.2%–51.14%) (Table 2). To test the effect on splicing, a minigene construct was designed. The cDNA analysis showed a pathogenic effect for the mutant construct as a complete exon 26 skipping effect is observed (Figure 1B). In the wild-type construct, we observe three different bands, with bands 1 and 2 exclusively present in the wild-type context. Fragment 1 corresponds to the recognition of exon 26 and fragment 2 results from the lack of recognition of the first 43 bp of a pSPL3 constitutive exon (Figure 1B). Eventually, fragment 3 corresponds to the coding sequence from the pSPL3

**Table 2. Predictions for candidate variants potentially altering splicing**

| Patient        | Gene         | Variant identified       | regSNP - intron |      | NNSplice         |             |              | MaxEnt             |                  |                     | SpliceAI             |                            |                 | VarSEAK       |  |
|----------------|--------------|--------------------------|-----------------|------|------------------|-------------|--------------|--------------------|------------------|---------------------|----------------------|----------------------------|-----------------|---------------|--|
|                |              |                          | Predict.        | WT   | MUT              | WT          | MUT          | Var (%)            | Score            | SPiP interp.        | SPiP % (rank)        | Class                      | Minigene effect |               |  |
| <b>RP-2034</b> | <b>USH2A</b> | <b>c.5168-26A&gt;C</b>   | <b>B</b>        | -    | -                | -           | -            | -                  | -                | <b>0.55 (AL)</b>    | <b>BPA</b>           | <b>43.04 (35.2-51.14)</b>  | <b>1</b>        | <b>ES</b>     |  |
| RP-1496        | ADGRV1       | c.3443G>A                | -               | -    | -                | -           | -            | -                  | -                | 0.53 (AG)           | NEP                  | 03.72 (01.51-07.52)        | 1               | NE            |  |
| <b>RP1950</b>  | <b>USH2A</b> | <b>c.4106C&gt;T</b>      | -               | -    | -                | -           | -            | -                  | -                | <b>0.31 (AL)</b>    | <b>REA</b>           | <b>54.00 (45.68-62.16)</b> | <b>1</b>        | <b>ES+NAS</b> |  |
|                |              | c.11549-5dup             | -               | -    | -                | 8.57        | 2.16         | -74.8 (AL)         | -                | -                   | NEP                  | 01.85 (00.38-05.32)        | 1               | NE            |  |
| RP-1222        | USH1C        | c.1234G>A                | -               | -    | -                | -           | -            | -                  | -                | 0.31 (AL)/0.34 (DL) | REA                  | 85.91 (79.27-91.06)        | 1               | NE            |  |
| <b>RP-1036</b> | <b>USH2A</b> | <b>c.8681+3960A&gt;G</b> | <b>PD</b>       | -    | <b>0.99 (AG)</b> | <b>1.09</b> | <b>9.84</b>  | <b>802.75 (AG)</b> | <b>0.98 (AG)</b> | <b>NEP</b>          | <b>00 (00-00.92)</b> | <b>5</b>                   | <b>PEC</b>      |               |  |
| RP-1600        | USH2A        | c.15298-1252T>G          | B               | -    | -                | -1.63       | 6.97         | 527.61 (AG)        | -                | NEP                 | 00 (00-00.92)        | 1                          | NE              |               |  |
| RP-1943        | USH2A        | c.6049+3895G>A           | B               | -    | 0.92 (AG)        | 2.44        | 4.93         | 102.05 (AG)        | -                | NEP                 | 00 (00-00.92)        | 1                          | NE              |               |  |
| RP-1455        | USH2A        | c.5299-2503A>G           | B               | -    | 0.58 (AG)        | -3.79       | 4.96         | 230.87 (AG)        | -                | NEP                 | 00.25 (00.01-01.39)  | 1                          | NE              |               |  |
| RP-1994        | USH2A        | c.11389+2566A>G          | PD              | -    | 0.73 (AG)        | -0.93       | 7.82         | 940.86 (AG)        | -                | NEP                 | 00 (00-00.92)        | 1                          | NE              |               |  |
|                |              | c.11048-2124A>G          | PD              | -    | 0.81 (AG)        | -2.14       | 6.61         | 408.88 (AG)        | -                | NEP                 | 00 (00-00.92)        | 4                          | NE              |               |  |
| RP-2264        | USH2A        | c.7120+4268A>G           | D               | -    | 0.65 (DG)        | -4.04       | 4.14         | 202.48 (DG)        | -                | NEP                 | 00 (00-00.92)        | 1                          | NE              |               |  |
| RP-2239        | USH2A        | c.7300+8957A>C           | B               | 0.46 | 0.74(AG)         | 6.22        | 5.44         | 19.61 (AG)         | -                | NEP                 | 00 (00-00.92)        | 1                          | NE              |               |  |
| RP-2268        | USH2A        | c.6806-810A>G            | D               | -    | 0.92 (DG)        | -0.37       | 7.81         | 2210.81 (DG)       | -                | NEP                 | 00.5 (00.06-01.78)   | 3                          | NE              |               |  |
| <b>RP-1815</b> | <b>USH2A</b> | <b>c.9958+3438A&gt;G</b> | <b>PD</b>       | -    | <b>0.98 (AG)</b> | <b>1.66</b> | <b>10.41</b> | <b>527.11 (AG)</b> | <b>0.97 (AG)</b> | <b>NEP</b>          | <b>00 (00-00.92)</b> | <b>3</b>                   | <b>PEC</b>      |               |  |
|                |              | c.4628-27169C>G          | D               | -    | 0.57 (DG)        | -1.77       | 6.49         | 466.67 (DG)        | -                | NEP                 | 00 (00-00.92)        | 2                          | NE              |               |  |

For regSNP-intron, NNSplice, and SpliceAI predictors, the scores are given within 0 (benign) to 1 (pathogenic). For VarSEAK the score ranks from 1 (benign) to 5 (pathogenic). Variants highlighted in bold showed an aberrant effect in splicing in the minigene assays. RP, patient number; NT, nucleotide; predict., prediction; B, benign; PD, probably damaging; TPR, true positive ratio; FPR, false positive ratio; WT, wild type; MUT, mutant; AG, acceptor gain; DG, donor gain; Var, variation; AL, acceptor loss; DL, donor loss; Interp., interpretation; BPA, branchpoint alteration; NEP, no effect predicted; REA, regulatory element alteration; ES, exon skipping; NE, no effect; NAS, new acceptor site; PEC, pseudoexon creation.

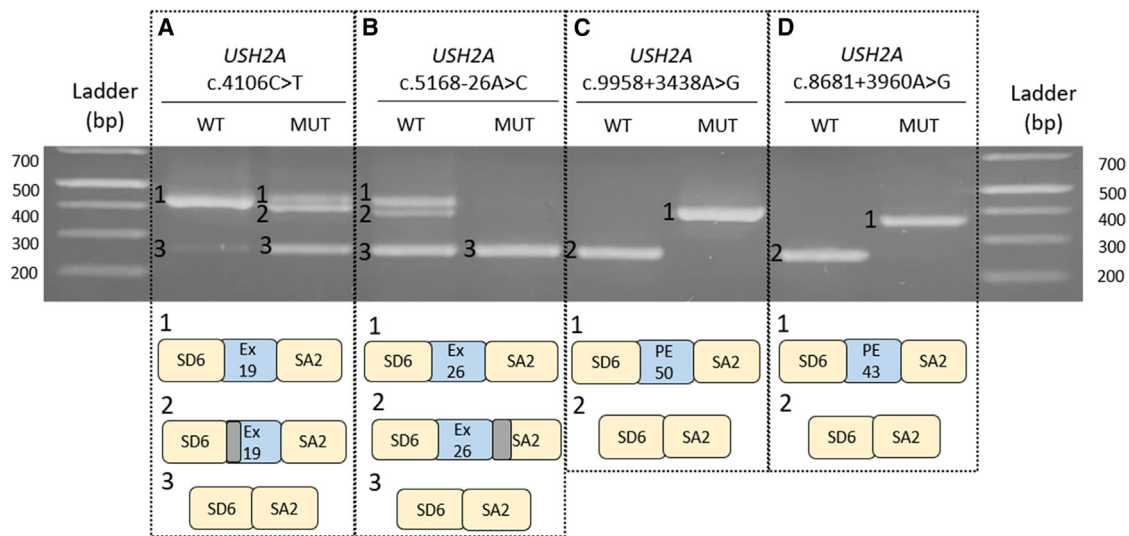

**Figure 1. Analyses of potential splicing modulating variants in *USH2A* using minigene splice assays**

SD6 and SA2 are the constitutive exons of pSPL3 plasmid and in blue boxes exons (ex) and pseudoexons (PEs) are depicted. The first three variants present a(n) (partial) exon-skipping effect, while the last two have included a PE in their sequence. Boxes in gray represent regions that have not been included in the sequence as an alternative splicing has occurred.

constitutive exons, which means that exon 26 of *USH2A* is not recognized. The *in silico* analysis predicted a premature stop codon to be created 92 nucleotides downstream of exon 26 resulting in a truncating protein. This exon skipping event is present in both the wild-type and mutant constructs, but the exon skipping band accounts for 100% of the total transcript in the mutant minigene compared with 34.6% for the wild-type minigene. Segregation analysis confirmed that this variant is present in *trans* with the c.2299del and co-segregates with the disease (Figure S1).

#### ***USH2A*: c.9958+3438A>G (PE50)**

Variant c.9958+3438A>G was identified in patient RP-1815, who was diagnosed with USH2 and monoallelic for the c.908G>A (p.Arg303His) variant in the *USH2A* gene. The splicing predictor scores supported the variant pathogenicity as a result of an acceptor site gain (tgAGtga). Alternative downstream donor sites were evaluated with NNSplice and SpliceAI 500, so we could identify a potential candidate donor site caagGtaatg (NNSplice: 0.98; SpliceAI 500: 0.85), which would lead to the inclusion of a PE of 144 bp. A fragment of 734 bp including the potential PE with ~250 nucleotides of flanking up- and downstream intronic sequences was cloned into the pSPL3 plasmid.

cDNA analysis after expression study showed a clear splicing effect where the predicted 144 bp PE was introduced in all of the detected transcripts, in the absence of any additional fragments (Figure 1C). Segregation analysis confirmed that both variants (c.9958+3438A>G and c.908G>A) are located on different alleles (Figure S1), thus supporting their pathogenicity as they co-segregate with the disease.

#### ***USH2A*: c.8681+3960A>G (PE43)**

Deep-intronic variant c.8681+3960A>G was identified in patient RP-1036, who was clinically diagnosed with USH. RP-1036 harbored variant c.2809+1G>A in heterozygosity in *USH2A*. All splicing analysis tools revealed pathogenic scores (NNSplice: 0.99; MaxEnt: 802.75% variation; SpliceAI: 0.98; VarSeak: 5), and all of them concurred with an acceptor site gain effect. In addition, NNSplice and SpliceAI 500 tools were used to search for alternative donor sites that could promote the inclusion of a PE in the cDNA. Both predictors revealed the alternative donor site gaggGtaaga (NNSplice: 1.00; SpliceAI 500: 0.82), which was 111 nucleotides away from the new acceptor site. Considering this region as a possible PE, a minigene was designed including 738 bp of *USH2A* intron 43. Results from minigene assay revealed a full splicing effect in the mutant construct

**Table 3. Copy-number variants identified**

| Patient | Family  | Gene          | Transcript | Genomic region      | Location    | Type | Validation method |
|---------|---------|---------------|------------|---------------------|-------------|------|-------------------|
| RP-1496 | FRP-350 | <i>ADGRV1</i> | NM_032119  | 89909918–89912318   | int1-int2   | DEL  | qPCR              |
| RP-2213 | FRP-719 | <i>MYO7A</i>  | NM_000260  | 76862211–76867161   | int4-int5   | DEL  | qPCR              |
| RP-681  | FRP-49  | <i>CDH23</i>  | NM_052836  | 73335893–73360492   | int8-int9   | DUP  | array HD          |
| RP-2159 | FRP-675 | <i>USH2A</i>  | NM_206933  | 215796232–216596790 | int37-int43 | DUP  | MLPA              |

int, intron; DEL, deletion; DUP, duplication.

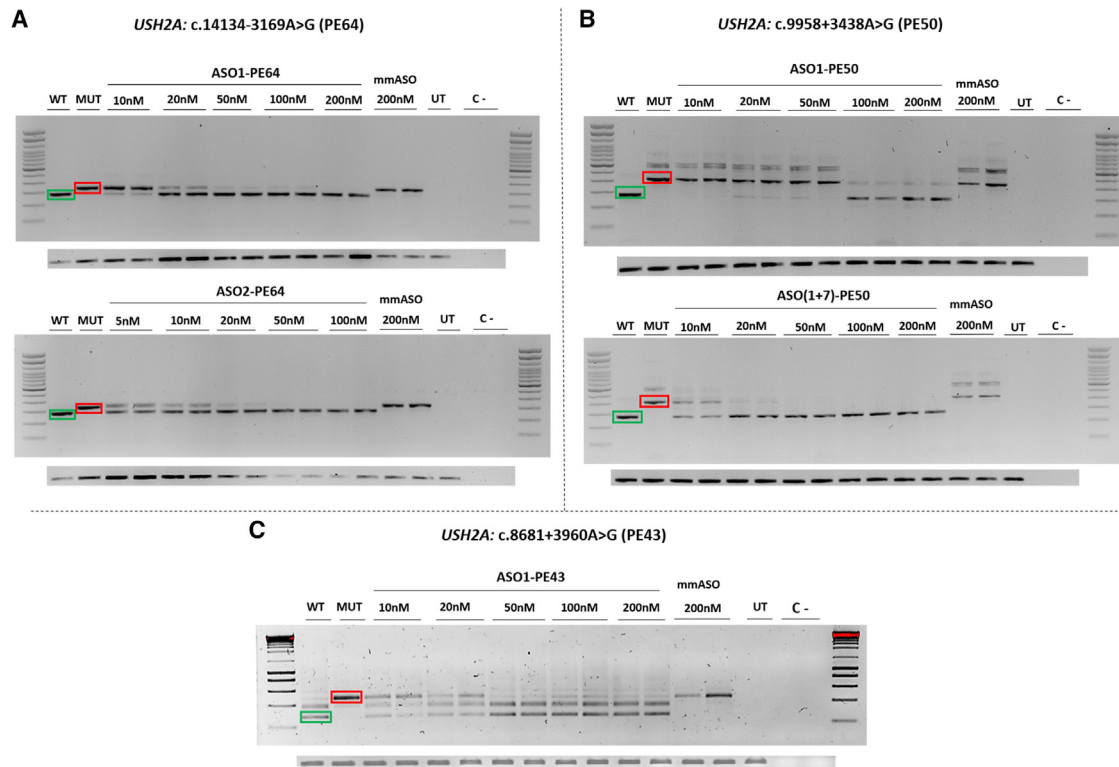

**Figure 2. ASO-induced redirection of aberrant splicing caused by deep-intronic variants**

Each section represents WT (green) and MUT (red) fragments and the different treatment dose. The lower panels in every section are the GAPDH loading control in each experiment. For PE 64 (A), two different ASO were tested separately. For PE50 (B), ASO7-PE50 was tested together with ASO1-PE50 due to the lower efficiency it showed individually and the concentrations shown for ASO(1+7)-PE50 refer to the final concentration of both ASO. For PE43 (C), only ASO1-PE43 was tested as the sequence did not agree with all the requirements. Differences between wild-type and mutant fragments of PE50 and PE43 constructs in Figure 1 compared with this figure can be observed due to the use of different cloning splice vector for each experiment. WT, wild type; MUT, mutant; UT, untreated; C-, negative control.

with the insertion of 112 intronic bp in the coding sequence (Figure 1D). The inclusion of this PE would promote the creation of a premature stop codon in the mRNA. DNA from relatives was not available for segregation analysis, so it remains unclear if the c.8681+3960A>G variant resides on the same allele as the previously identified canonical splice site variant c.2809+1G>A.

#### ASO splicing redirection assay

The PE inclusion caused by the two deep-intronic variants identified in this study (c.9958+3438A>G and c.8681+3960A>G), and the previously described variant in intron 64 (c.14134-3169A>G), drove us to design ASOs with the aim of redirecting aberrant splicing, thereby preventing the PE inclusion in the coding sequence. Two ASOs were designed targeting the different PE regions, except for PE43 in which only one matched all requirements, and their efficacy was evaluated using minigene splice assays (Table S2). The two-nucleotide mismatch ASO (mmASO) used as control indicates the specificity of the ASOs as it is not able to redirect splicing.

Related to PE64, at a dose of 20 nM, ASO1-PE64 redirected the aberrant splicing, and it can also be observed how, from 10 to 20 nM, the

fragment intensities show that the minimum efficient dose is 20 nM (Figure 2A). For ASO2-PE64, 5 nM is still effective for splicing redirection (Figure 2A). Concerning PE50, caused by c.9958+3438A>G, ASO1-PE50 was capable of redirecting the splicing at a dose of 100 nM (Figure 2B), while a combination of ASO1-PE50 and ASO7-PE50 was efficient enough at 20 nM (10 nM of each ASO), showing a synergic effect (Figure 2B). Results in PE43, due to c.8681+3960A>G variant, ASO1-PE43 showed great redirection of the splicing process with a minimum efficient dose of 50 nM (Figure 2C). The results obtained from the two mismatch ASOs used as a control (mmASO), showed a full specificity of all designed ASOs for each PE (Figure 2).

#### DISCUSSION

The diagnosis of both IRD and USH patients has commonly been accomplished by targeted NGS through custom panels and WES. Nevertheless, these approaches are focused on the coding sequence, which means that the role of regulatory and deep-intronic regions in the pathogenicity of these diseases is overlooked. Lately, more studies progressively emphasize the importance of non-coding regions when searching for pathogenic variants.<sup>25,49–54</sup> This has

already resulted in the identification of several deep-intronic variants in *USH2A* and *CLRN1* that result in the inclusion of a PE in the mRNA.<sup>25,33–36</sup>

After the study of our USH patients by either custom gene panels or WES, 10%–20% of analyzed individuals appeared to be monoallelic for a pathogenic variant in one of the USH genes in the absence of a second pathogenic variant.<sup>55–60</sup> Motivated by this, we designed a custom panel including the whole genomic sequence of the USH genes to identify the second causative variant in non-coding regions and so unravel the genetic diagnosis in these cases.

It is remarkable how just the analysis of five deep-intronic previously reported variants in patients with monoallelic variants in the *USH2A* gene allowed us to complete the diagnosis in over 30% of the patients studied (Table 1). As expected, since it is one of the most frequent pathogenic *USH2A* variants found in the Mediterranean region, the intronic variant c.7595-2144A>G was also common in our cohort,<sup>39,61–63</sup> found in 61.5% of the solved patients of the screening. Even more, we identified a patient carrying two different deep-intronic *USH2A* variants (c.7595-2144A>G and c.9959-4159A>G) both in heterozygosity, highlighting the importance of screening the non-coding regions, as classical approaches would have completely missed these variants.

The combination of whole USH genes sequencing along with *in silico* and *in vitro* studies, through minigene assays due to the low expression of USH genes in peripheral blood, allowed us to confirm aberrant splicing induced by four different variants.

On the one hand, it has allowed us to identify two new deep-intronic variants in two different patients and a PE inclusion was shown in minigene assays (c.8681+3960A>G and c.9958+3438A>G). On the other hand, an effect in cDNA was validated in two variants located in splicing regulatory elements of *USH2A* (c.5168-26A>C; c.4106C>T). Variant c.4106C>T in *USH2A* was described previously,<sup>64</sup> but there was no evidence of its impact in splicing. In addition to the splicing predictions reported in this study, our minigene assay showed an exon skipping together with the creation of a new acceptor site. Nevertheless, the wild-type fragment is still present in the mutant context at 32.8%. Thus, we cannot confirm that this variant is clearly pathogenic as 20% of wild-type *USH2A* transcript has been reported to be enough for correct protein function.<sup>41</sup> It should be taken into account that the outcomes observed by minigenes may differ from the *in vivo* situation since minigene assay is an *in vitro* model that presents some limitations. Minigene constructs incorporate only a part of the genomic sequence, which does not capture the full complexity of regulatory elements. Moreover, splicing can be different in different cell types due to the presence of cell-type-specific splice factors. In this line, complementary studies using patient-derived cells, such as photoreceptor precursor cells differentiated from patient-derived iPSCs, are crucial for obtaining a more accurate understanding of splicing events and their pathogenic consequences.<sup>25,65,66</sup> Despite their limitations, minigene studies remain a very useful and practical

tool for assessing potential splicing alterations in pathologies where the genes have low or no expression in accessible tissues.

Predicting the effect of nucleotide changes on splicing is challenging because this is a complex process regulated by numerous factors. Various studies have analyzed the sensitivity and specificity of different splicing predictors and cutoff values.<sup>67–69</sup> Recently, Reurink and colleagues suggested to use a SpliceAI score of 0.1 for deep-intronic and canonical splice site variants, and a more restrictive cutoff of  $\geq 0.2$  for exonic changes in non-canonical positions.<sup>25</sup> In this study, we selected variants with a score  $\geq 0.2$  for SpliceAI,<sup>69,70</sup> and/or with a variation score  $>10\%$  for MaxEnt.<sup>34</sup> However, only 4 out of the 16 selected candidate variants (25%) in our study showed a deleterious effect on splicing, which led us to recommend a more stringent pipeline. Of the 4 variants whose splicing effect was functionally validated, all were predicted by SpliceAI. However, 2 of them would have been missed based solely on MaxEnt predictions. Among the 12 selected variants where an effect was not confirmed in the minigene assay, the majority were selected based on MaxEnt criteria. If we had only considered variants with a SpliceAI score  $\geq 0.2$ , only 6 variants would have been selected for validation, and functional aberrant splicing effects would have been confirmed in 4 of them (67%). These data suggest that SpliceAI is consolidating itself as one of the best tools for predicting potential aberrant effects on splicing. In contrast, MaxEnt predictions alone yielded several false positives, so we would recommend using it in combination with other more accurate predictors.

Variants in UTRs have been already described in many genes with different effects on gene expression. However, predicting the effects of alterations in these regions remains challenging and cannot be done in a simple and automated way.<sup>71,72</sup> In addition, functional assays are still necessary to assess the impact of these variants. Recently, Dueñas Rey et al.<sup>73</sup> have developed a strategy for the prioritization and evaluation of 5' UTR variants in combination with functional studies. They identified several variants in 5' UTR predicted to have different functional consequences, highlighting the contribution of non-coding regions in IRDs. Considering the transcriptional complexity of the retina, more studies using ChIP-seq or RNA-seq techniques are needed for a better identification and definition of the regulatory regions.<sup>74–77</sup>

Several USH genes contain repetitive regions, which result in a lower capture efficiency. Therefore, we cannot rule out that variants in these poorly covered regions might have been missed due to technical limitations. Currently, a proper alternative would be whole-genome sequencing (WGS), as it helps to overcome these issues associated with sequence capture and provide more uniform sequencing.<sup>25,78</sup> In a study carried out by Reurink et al. in 2023, 49% of patients who previously underwent WES analysis<sup>25</sup> were solved by the identification of either a deep-intronic variant or SVs (structural variants) through WGS. This study also remarks on the relevance of SVs in IRD patients.<sup>26,79,80</sup> In our study, four putative CNVs were identified using a specific bioinformatic pipeline, and only two of them were validated

by different approaches. However, the complexity of some types of SVs makes their alterations difficult to detect using short-read sequencing technologies. To solve this limitation, long-read sequencing approaches or optical genome mapping are yielding promising results in the identification of SV and other complex alterations such as short repeat tandem.<sup>81,82</sup>

To redirect aberrant splicing caused by identified variants and prevent the inclusion of PEs in the coding sequence, ASOs were designed for the *USH2A* deep-intronic variants c.9958+3438A>G and c.8681+3960A>G identified in this study, as well as for the previously identified pathogenic *USH2A* variant c.14134-3169A>G.<sup>35</sup> We obtained minimum efficient doses of 20 nM (ASO1-PE64) and 5 nM (ASO2-PE64) for c.14134-3169A>G; 100 nM (ASO1-PE50) and 20 nM (ASO(1+7)-PE50) for c.9958+3438A>G; 50 nM (ASO1-PE43) for c.8681+3960A>G. These results match previous data from deep-intronic variants in *USH2A*,<sup>25,63</sup> and highlight the effectiveness of ASOs to modulate splicing through PE inclusion blocking. In total, every minimum efficient dose was below 200 nM, which was the maximum dose established for each experiment and which reassures their therapeutic potential.

ASOs have a high potential to modulate gene expression.<sup>83–85</sup> Genetic approaches based on ASOs present certain advantages compared with other genetic intervention strategies such as gene augmentation: they can only temporarily interfere in the mRNA (so there is not the risk of permanent off-target effect at genomic level), endogenous gene expression levels are not modified and do not alter the transcript and protein isoform landscape of the target genes. Moreover, the small size of ASOs allows the intravitreal delivery with an effective reach of all retinal cells with low inflammatory effects instead of the use of AAVs, which requires surgical subretinal techniques for delivery and only a fraction of the retina will be reached resulting in a lower efficacy. Particularly for splicing correction, ASOs do not rely on preclinical animal testing, which is a requisite for exon-skipping approaches in which the resulting protein function should be proved, for instance, “ultervursen” for *USH2A* exon 13 skipping.<sup>41,86</sup> This does not excuse the need for a dose finding study for ASOs modulating splicing, at least with an *in vitro* model such as 3D organoids. Also, toxicity assays are required (mostly in vertebrates, but sometimes in non-human primates).<sup>87</sup> Furthermore, strategies improving the ASO targeting of specific tissues and cell types has also been described.<sup>88–91</sup>

To overcome the *in vivo* instability due to nuclease activity, in the second-generation ASOs some improvements have been done, such as including a phosphorothioate backbone and a sugar modification (2'-O-methoxyethyl [2'-O-MOE]).<sup>92,93</sup> It has been reported that second-generation ASOs allow increased *in vivo* half-life times, being around 200 days.<sup>86,94</sup> Despite this, some disadvantages involve the need for recurrent intravitreal injections. The use of AAV could be a good solution as its potential has been shown previously in cellular and animal models of Leber congenital amaurosis associated with a deep-intronic *CEP290* mu-

tion.<sup>95</sup> However, since viral vectors do not produce and deliver second-generation ASOs, the specificity and efficacy of the treatments would be affected. An alternative for this limitation is a strategy based on the enclosure of ASOs in a U7snRNA complex followed by an AAV-based delivery, which turned out to improve the long-term efficacy of the treatment.<sup>96</sup>

Regarding this, clinical trials based on the use of ASOs for treating IRD caused by a deep-intronic variant in *CEP290* as well as by variants harbored in exon 13 of *USH2A* were initiated (ClinicalTrials.gov: NCT03780257, NCT03140969, NCT03913143).<sup>97</sup> However, after initially being discontinued by ProQR Therapeutics, Théa (<https://www.laboratoires-thea.com>) is currently preparing phase 3 clinical trials for both programs. In addition, an ASO-based allele-specific mRNA knockdown/degradation approach for dominantly inherited RP caused by pathogenic variants in *RHO* is underway in a clinical trial (NCT04123626), as are two different approved treatments for spinal muscular atrophy and Duchenne muscular dystrophy based on ASOs that modulate the splicing process.<sup>98,99</sup> Although ASO-based splicing modulation is mostly a mutation-specific approach, mutational hotspots could also be a great target to focus on.

In summary, this study demonstrates the importance of the analysis of non-coding regions to solve some of the cases that are not diagnosed after gene panels, clinical exome, or WES. The molecular diagnosis is essential for the eligibility of receiving a gene- or mutation-based treatment. To date, between 30% and 40% of patients still do not receive a conclusive genetic diagnosis, which in part could be explained by the presence of pathogenic variants in regions that are (technically) difficult to sequence (for instance, ORF15 in *RPGR*). However, the presence of variants in non-coding regions (introns or *cis*-regulatory elements), the insertion of mobile elements and even epigenetic modifications could underlie the lack of diagnosis in the major part of these unexplained cases. Identification of (deep-)intronic variants that affect pre-mRNA splicing opens up future treatment options using antisense technology.

## MATERIALS AND METHODS

### Patient selection

Fifty-nine patients from 58 different families (Table S1) harboring a pathogenic variant in a USH gene and in whom the coding regions of the genes of interest had been previously studied, were selected (B.G.-B., G.G.-G., and J.M.M., unpublished data).<sup>55–58,60</sup> Their diagnosis varied from any of the USH subtypes (42/59) to autosomal recessive nsRP (16/59) (Table S1). DNA from peripheral blood was isolated from all of them by automatic extraction with QIAasympyony (QIAGEN).

Different ophthalmologic tests were carried out in each patient, such as OCT, eye fundus, ERG, and evoked potentials. The Hospital La Fe Ethics and Fundacion Jimenez Diaz-University Hospital Ethics Committees approved this study in agreement with the Declaration of Helsinki. Informed consent was signed by all patients and relatives who participated in the study.



### Sanger screening of *USH2A* deep-intronic variants

We performed a Sanger screening of the 5 deep-intronic variants (c.7595-2144A>G; c.5573-834A>G; c.8845+628C>T; c.9959-4159A>G; c.14134-3169A>G) that were already described as pathogenic in *USH2A* gene in 41 carriers of 1 heterozygous mutation in this gene.<sup>33–35</sup> We did not accomplish the screening in patients RP-2264 and RPN-803, who were previously sequenced with a custom panel containing these 5 variants. The 5 regions were analyzed as described previously.<sup>33–35</sup>

### Panels design and high-throughput sequencing

A first custom panel (P1) was designed including the whole-genomic sequence of the 13 USH genes and 2,000 flanking bases of UTRs of all of them (*MYO7A*, *CDH23*, *PCDH15*, *USH1G*, *USH1C*, *CIB2*, *USH2A*, *ADGRV1*, *WHRN*, *CLRN1*, *HARS*, *CEP250*, *PDZD7*). The panel size encompasses 3,295.139 kb. The library preparation was performed following the Kapa HyperPlus Workflow (Roche) and it was sequenced in a NextSeq platform (Illumina, San Diego, CA) in 300 cycles of 2 × 150 bp reads. The P1 was sequenced in 27 patients, of which 17 had a mutation in *USH2A*, 3 in *ADGRV1*, 2 in *CDH23*, 2 in *MYO7A*, 2 in *USH1C*, and 1 in *PCDH15* (Table S1). Patient RP-1741 was included as an internal control for panel sequencing. This case carried 2 heterozygous deep-intronic variants in *USH2A* gene (c.9959-4159A>G and c.14134-3169A>G).

A second panel (P2) was designed including the whole-genome sequence of *USH2A*, since all remaining USH patients harbored one mutation in *USH2A*. Thus, a total of 779.928 kb was sequenced in six patients. The library was prepared following the SureSelectXT Target Enrichment System (Agilent Technologies) and sequenced in a MiSeq platform (Illumina) in 600 cycles of 2 × 300 bp. The P2 was sequenced in six patients, all of them carrying a mutation in *USH2A* gene (Table S1).

### Sequencing data analysis

Quality control of reads was performed using FastQC (v.0.11.4, <https://github.com/s-andrews/FastQC>) and samtools (v.1.3.1).<sup>100</sup> The reads were aligned against the GRCh38 human genome of reference using BWA aligner (v.0.7.15-r1140),<sup>101</sup> and single-nucleotide variants (SNVs) and small insertions and deletions (indels) were called using strelka (v.2.9.10).<sup>102</sup> Variants were annotated with Variant Effect Predictor (ensembl-vep v.99.2),<sup>103</sup> using MaxEnt and SpliceAI (v.1-3, <https://github.com/Illumina/SpliceAI>).

For variant filtering, we selected variants with a minor allele frequency of  $\leq 0.01$  and those located in the target gene. Subsequently, variants with either a SpliceAI score  $\geq 0.2$  or a MaxEnt variation score  $>10\%$  and/or a value score  $\geq 3$  were used for acceptor/donor gain predictions. Additional *in silico* analysis was performed using the splicing predictors NNSplice ([https://www.fruitfly.org/seq\\_tools/splice.html](https://www.fruitfly.org/seq_tools/splice.html)), VarSeak (<https://varseak.bio/>), regSNP-intron (<https://regsnps-intron.cccb.iupui.edu/>), and SPiP (available in <https://mobidetails.iurc.montp.inserm.fr/MD/>) to predict alterations of natural splice sites. Variants predicted to create a new splicing

site were further investigated using SpliceAI 500 (available in <https://mobidetails.iurc.montp.inserm.fr/MD/>) to trace the presence of alternative splicing sites, which can promote a PE inclusion. Variants supposed to alter either a branchpoint or an enhancer motif were studied with different predictors such as ESEfinder (<http://krainer01.cshl.edu/cgi-bin/tools/ESE3/ese finder.cgi?process=home>), SVM-BPfinder ([http://regulatorygenomics.upf.edu/Software/SVM\\_BP/](http://regulatorygenomics.upf.edu/Software/SVM_BP/)), and LaBranchoR (available in <https://genome.ucsc.edu/>). Alternative open reading frames caused by premature stop codons were analyzed for every variant in which an alteration in splicing was predicted ([https://www.bioinformatics.org/sms/orf\\_find.html](https://www.bioinformatics.org/sms/orf_find.html)).

In addition, all coding regions were re-analyzed following the filters already described in previous studies.<sup>55,58</sup>

### CNV analysis

Analysis of CNV has been assessed using a bioinformatic pipeline (<https://github.com/TBLabFJD/NextVariantFJD>) including three different CNV detection programs: CoNVaDING,<sup>104</sup> ExomeDepth,<sup>105</sup> and panelcn.MOPS.<sup>106</sup> Programs were run using a bed file defining windows of 150 bp within the captured regions<sup>104</sup> to facilitate the performance of the algorithms, all based on sequenced depth comparison. Analysis batches were defined by gene panels and sequencing runs to avoid different coverages due to technical reasons. Variants were annotated using AnnotSV.<sup>107</sup> We prioritized variants for further validation based on their presence in genes of interest, pathogenicity predictions, and number of programs that detected them. In addition, for cases with no variants identified the analysis was extended to the rest of genes.

Once variants were prioritized, they were validated by different techniques relying on the region to be analyzed: MLPA (MRC Holland; probemixes P361 and P362 for *USH2A*), CytoScan HD Array (Thermo Fischer Scientific), or qPCR.

### Validation and segregation of candidate variants

Validation of candidate SNVs was assessed by Sanger sequencing as described previously.<sup>58</sup> Similarly, segregation analysis was performed in 4 families out of the 21 solved patients (Figure S1) since DNA from all relatives was not available.

### Functional validation of the identified deep-intronic variants

Splicing effects were validated by minigene assays. DNA was amplified by the Fidelity Phusion polymerase (Thermo Fisher Scientific, Waltham, MA). The products were purified and digested with either XhoI or NdeI and NheI. Afterward, digested products were cloned between restriction sites in pSPL3 plasmid (Dr. I. Botillo and Dr. S. Tuffery-Giraud), by using T4 ligase. The different primers of the regions amplified and cloned as well as the different minigene construct design are detailed in the supplemental information (Table S3; Figure S2). Transformation of *Escherichia coli* occurred by electroporation. Later, 1  $\mu\text{g}$  of each clone was transfected in duplicate into HEK293 cells (Lipofectamine 3000 reagents, Thermo Fisher Scientific) grown in a 6-well plate. After 24 h, RNA was isolated using

**USH2A: c.14134-3169A>G (PE64)**

Intron 64 CUCUCCAUUUUUCUAGGAGAAGCCACACACUAAAGAAAGAGAAAAUACACAACUGUUUGUUCACAAGGUAUUUUUUUUUAUUGA

ASO1-PE64: GGGCUUCUCCUAGAAAAUUGG

ASO2-PE64: ACUUGUGAACAAACAGUUG

**USH2A: c.9958+3438A>G (PE50)**

Intron 50 UUUCUUGGUGCUUUUGCAGUGUAAAAUUGCCAGAUAUCCGUU ... GACGGAGAGAUACUCCAGUCAAGGUAUUGAAGGGGGUUG

ASO1-PE50: CUUGGCCAUUUUUACACUGCA

ASO7-PE50: UACCUUGACUGGAGUGAUCUC

**USH2A: c.8681+3960A>G (PE43)**

Intron 43 UUUUUUUUUUUUUGCAGUGACAAUUUGGAGGAGACCUCUAUG ... UUUCGUCUUAUUUUCAAAGAAGGUAAGACUUAAGAUG

ASO1-PE43: GUCUCCAUC~~CAAAUUGUCA~~UG

**Figure 3. Position of the designed ASOs with respect to the different PEs**

Sequences in gray represent the intronic region, whereas the blue nucleotides correspond to the PEs. Variants are depicted in red. The lines below the different intron indicate the specific sequence for each ASO, which are also empathized right under them. PE50 and PE43 are disrupted by dots to make all sequences equal in length.

an RNeasy mini kit and reverse transcription was assessed using the PrimeScript RT Reagent Kit (TaKaRa, Kusatsu, Japan). Constitutive exons primers from pSPL3 were used to amplify the final product in a 2% agarose gel,<sup>108</sup> from which the different bands were purified using a QIAquick Gel Extraction Kit (QIAGEN, Hilden, Germany). Eventually, the products were sequenced by Sanger and analyzed using the chromatogram viewer FinchTV (<https://digitalworldbiology.com/FinchTV>) to identify any modification due to an alteration in the splicing process. Calculating the transcript counts resulting from minigene assays was performed using ImageJ (<https://imagej.net/ij/>), an image processing program. First, we determined the intensity of the fragment of interest in relation to the background and then we calculated the relative intensity of this fragment with respect to the rest of the bands observed.

To test the splicing redirection potential of several ASOs, minigene constructions were built again as described previously.<sup>109</sup> The pCI-neo plasmid, which contains exons of *RHO* allowing the study of splicing, was cloned using the gateway cloning approach. In this line, ASO assay could also match described guidelines and efficiency observed in recent work.<sup>25,110,111</sup>

### ASO design and testing

As mentioned in the section above, the designing of the ASOs was carried out following published guidelines,<sup>110,111</sup> and purchased through Eurogentec (Seraing, Belgium). The ASOs were ordered with 2'-O-MOE modifications and a fully phosphorothiorate backbone. Two different ASOs overlapping the 5' and 3' boundaries between PE and intron were designed for PE50 (ASO1-PE50; ASO7-PE50) and PE64 (ASO1-PE64; ASO2-PE64), except for PE43 (ASO1-PE43), whose secondary structure made it complicated to target more than

one region. For PE50 and PE64, ASOs were tested both separately and together by adjusting the final concentration to see if there was a possible synergic effect. The relative position of each ASO on the different PE sequence is depicted in Figure 3.

To ensure a specific binding of the ASO, unspecific targets were searched in NCBI blast. The ASO reconstitution was done in PBS 1× to a concentration of 1 mM and later aliquoted and diluted with PBS 1× to a concentration of 0.1 mM. Different volumes were co-transfected in duplicate with the pCI-neo-based minigene constructs with FuGENE HD transfection reagent (Promega) to test different doses of ASOs. Twenty-four hours later, cells were harvested and the RNA was analyzed. The ASOs were firstly tested at 20 and 200 nM both separately and together (for PE50 and PE64), which led to further studies in which the minimum effective doses were established. A 2 nucleotide mmASO was used as control for every experiment and it was transfected at 200 nM and in duplicate. Since it is not able to redirect splicing, this control ASO is an indicator of the specificity of the ASOs for each PE.

### DATA AND CODE AVAILABILITY

Genomic data will be available upon request. In addition, all sequencing data are deposited to a public repository under the dataset code EGAD5000000687 (European Genome-Phenome Archive).

### ACKNOWLEDGMENTS

J.M.M. received two grants from Instituto de Salud Carlos III (ISCIII), "PI22/00213" and "AC21\_2/00022." G.G.-G. acknowledges two grants from Instituto de Salud Carlos III (ISCIII), "CP22/00028" and "PI22/01371," co-funded by the European Union. G.G.-G. has also a grant funded by the European Union in the HORIZON programme HORIZON-HLTH-2023-TOOL-05-04 (BETTER, 101136262). P.B.-M. received a grant from Ministerio de Universidades "FPU20/04736", co-funded by the European Union. This study was also supported by Stichting Ushersyndroom, de Gelderse

Blindenstichting, and the Foundation Fighting Blindness USA (grant no. PPA-0517-0717-RAD to E.V.W.). C.A. received a grant from Instituto de Salud Carlos III (ISCIII), “PI22/00321.”

## AUTHOR CONTRIBUTIONS

Conceptualization and supervision, J.M.M., G.G.-G., E.V.W., and E.d.V.; methodology, B.G.-B., P.B.-M., S.B., and E.d.V.; resources, B.G.-B., P.B.-M., E.A., C.R., L.F.-C., S.B., and E.d.V.; bioinformatic analysis and data curation, P.M. and A.S.-J.; writing – original draft, B.G.-B.; writing – review & editing, B.G.-B., P.M., A.S.-J., C.A., E.V.W., G.G.-G., and J.M.M.; funding acquisition, J.M.M. and G.G.-G. All authors have read and agreed to the published version of the manuscript.

## DECLARATION OF INTERESTS

The authors declare no competing interests.

## SUPPLEMENTAL INFORMATION

Supplemental information can be found online at <https://doi.org/10.1016/j.omtn.2024.102374>.

## REFERENCES

- Heath Jeffery, R.C., Mukhtar, S.A., McAllister, I.L., Morgan, W.H., Mackey, D.A., and Chen, F.K. (2021). Inherited retinal diseases are the most common cause of blindness in the working-age population in Australia. *Ophthalmic Genet.* *42*, 431–439. <https://doi.org/10.1080/13816810.2021.1913610>.
- Verbakel, S.K., van Huet, R.A.C., Boon, C.J.F., den Hollander, A.I., Collin, R.W.J., Klaver, C.C.W., Hoyng, C.B., Roepman, R., and Klevering, B.J. (2018). Non-syndromic retinitis pigmentosa. *Prog. Retin. Eye Res.* *66*, 157–186. <https://doi.org/10.1016/j.preteyeres.2018.03.005>.
- Tatour, Y., and Ben-Yosef, T. (2020). Syndromic Inherited Retinal Diseases: Genetic, Clinical and Diagnostic Aspects. *Diagnostics* *10*, 779. <https://doi.org/10.3390/diagnostics10100779>.
- Espinós, C., Millán, J.M., Beneyto, M., and Nájera, C. (1998). Epidemiology of Usher Syndrome in Valencia and Spain. *Public Health Genomics* *1*, 223–228. <https://doi.org/10.1159/000016167>.
- Kimberling, W.J., Hildebrand, M.S., Shearer, A.E., Jensen, M.L., Halder, J.A., Trzuppek, K., Cohn, E.S., Weleber, R.G., Stone, E.M., and Smith, R.J.H. (2010). Frequency of Usher syndrome in two pediatric populations: Implications for genetic screening of deaf and hard of hearing children. *Genet. Med.* *12*, 512–516. <https://doi.org/10.1097/GIM.0b013e3181e5afb8>.
- Castiglione, A., and Möller, C. (2022). Usher Syndrome. *Audiol. Res.* *12*, 42–65. <https://doi.org/10.3390/audiolres12010005>.
- Booth, K.T., Kahrizi, K., Babanejad, M., Daghigh, H., Bademci, G., Arzhangi, S., Zareabdollahi, D., Duman, D., El-Amraoui, A., Tekin, M., et al. (2018). Variants in CIB2 cause DFNB48 and notUSH1J. *Clin. Genet.* *93*, 812–821. <https://doi.org/10.1111/cg.13170>.
- Khateb, S., Kowalewski, B., Bedoni, N., Damme, M., Pollack, N., Saada, A., Obolensky, A., Ben-Yosef, T., Gross, M., Dierks, T., et al. (2018). A homozygous founder missense variant in arylsulfatase G abolishes its enzymatic activity causing atypical Usher syndrome in humans. *Genet. Med.* *20*, 1004–1012. <https://doi.org/10.1038/gim.2017.227>.
- Abad-Morales, V., Navarro, R., Burés-Jelstrup, A., and Pomares, E. (2020). Identification of a novel homozygous ARSG mutation as the second cause of Usher syndrome type 4. *Am. J. Ophthalmol. Case Reports* *19*, 100736. <https://doi.org/10.1016/j.ajoc.2020.100736>.
- Peter, V.G., Quinodoz, M., Sadio, S., Held, S., Rodrigues, M., Soares, M., Sousa, A.B., Coutinho Santos, L., Damme, M., and Rivolta, C. (2021). New clinical and molecular evidence linking mutations in ARSG to Usher syndrome type IV. *Hum. Mutat.* *42*, 261–271. <https://doi.org/10.1002/humu.24150>.
- Fowler, N.H., El-Rashedy, M.I., Chishti, E.A., Vander Kooi, C.W., and Maldonado, R.S. (2021). Multimodal imaging and genetic findings in a case of ARSG-related atypical Usher syndrome. *Ophthalmic Genet.* *42*, 338–343. <https://doi.org/10.1080/13816810.2021.1891552>.
- Velde, H.M., Reurink, J., Held, S., Li, C.H.Z., Yzer, S., Oostrik, J., Weeda, J., Haer-Wigman, L., Yntema, H.G., Roosing, S., et al. (2022). Usher syndrome type IV: clinically and molecularly confirmed by novel ARSG variants. *Hum. Genet.* *141*, 1723–1738. <https://doi.org/10.1007/s00439-022-02441-0>.
- Peter, V.G., Quinodoz, M., Sadio, S., Held, S., Rodrigues, M., Soares, M., Sousa, A.B., Santos, L.C., Damme, M., and Rivolta, C. (2022). New clinical and molecular evidence linking mutations in ARSG to Usher syndrome type IV. *Hum. Mutat.* *43*, 2326–2327. <https://doi.org/10.1002/humu.24496>.
- Ebermann, I., Phillips, J.B., Liebau, M.C., Koenekoop, R.K., Schermer, B., Lopez, I., Schäfer, E., Roux, A.F., Dafinger, C., Bernd, A., et al. (2010). PDZD7 is a modifier of retinal disease and a contributor to digenic Usher syndrome. *J. Clin. Invest.* *120*, 1812–1823. <https://doi.org/10.1172/JCI39715>.
- Khateb, S., Zelinger, L., Mizrahi-meissonnier, L., Ayuso, C., Koenekoop, R.K., Laxer, U., Gross, M., Banin, E., and Sharon, D. (2014). A Homozygous Nonsense CEP250 Mutation Combined with a Heterozygous Nonsense C2orf71 Mutation Is Associated with Atypical Usher Syndrome, pp. 460–469. <https://doi.org/10.1136/jmedgenet-2014-102287>.
- Tiwari, A., Bahr, A., Bähr, L., Fleischhauer, J., Zinkernagel, M.S., Winkler, N., Barthelmes, D., Berger, L., Gerth-Kahlert, C., Neidhardt, J., and Berger, W. (2016). Next generation sequencing based identification of disease-associated mutations in Swiss patients with retinal dystrophies. *Sci. Rep.* *6*, 28755. <https://doi.org/10.1038/srep28755>.
- Fu, Q., Xu, M., Chen, X., Sheng, X., Yuan, Z., Liu, Y., Li, H., Sun, Z., Li, H., Yang, L., et al. (2017). CEP28 is mutated in a distinct type of Usher syndrome. *J. Med. Genet.* *54*, 190–195. <https://doi.org/10.1136/jmedgenet-2016-104166>.
- Whatley, M., Francis, A., Ng, Z.Y., Khoh, X.E., Atlas, M.D., Dilley, R.J., and Wong, E.Y.M. (2020). Usher Syndrome: Genetics and Molecular Links of Hearing Loss and Directions for Therapy. *Front. Genet.* *11*, 565216. <https://doi.org/10.3389/fgene.2020.565216>.
- Gao, F.-J., Wang, D.-D., Chen, F., Sun, H.-X., Hu, F.-Y., Xu, P., Li, J., Liu, W., Qi, Y.-H., Li, W., et al. (2021). Prevalence and genetic-phenotypic characteristics of patients with USH2A mutations in a large cohort of Chinese patients with inherited retinal disease. *Br. J. Ophthalmol.* *105*, 87–92. <https://doi.org/10.1136/bjophthalmol-2020-315878>.
- Karali, M., Testa, F., Di Iorio, V., Torella, A., Zeuli, R., Scarpato, M., Romano, F., Onore, M.E., Pizzo, M., Melillo, P., et al. (2022). Genetic epidemiology of inherited retinal diseases in a large patient cohort followed at a single center in Italy. *Sci. Rep.* *12*, 20815. <https://doi.org/10.1038/s41598-022-24636-1>.
- Perea-Romero, I., Gordo, G., Iancu, I.F., Del Pozo-Valero, M., Almoguera, B., Blanco-Kelly, F., Carreño, E., Jimenez-Rolando, B., Lopez-Rodriguez, R., Lorda-Sanchez, I., et al. (2021). Genetic landscape of 6089 inherited retinal dystrophies affected cases in Spain and their therapeutic and extended epidemiological implications. *Sci. Rep.* *11*, 1526. <https://doi.org/10.1038/s41598-021-81093-y>.
- Toualbi, L., Toms, M., and Moosajee, M. (2020). USH2A-retinopathy: From genetics to therapeutics. *Exp. Eye Res.* *201*, 108330. <https://doi.org/10.1016/j.exer.2020.108330>.
- Shen, C., You, B., Chen, Y.-N., Li, Y., Li, W., and Wei, W.-B. (2022). Whole-exome sequencing identified genes known to be responsible for retinitis pigmentosa in 28 Chinese families. *Mol. Vis.* *28*, 96–113.
- Britten-Jones, A.C., Gocuk, S.A., Goh, K.L., Huq, A., Edwards, T.L., and Ayton, L.N. (2023). The Diagnostic Yield of Next Generation Sequencing in Inherited Retinal Diseases: A Systematic Review and Meta-analysis. *Am. J. Ophthalmol.* *249*, 57–73. <https://doi.org/10.1016/j.ajoc.2022.12.027>.
- Reurink, J., Weisschuh, N., Garanto, A., Dockery, A., van den Born, L.I., Fajardy, I., Haer-Wigman, L., Kohl, S., Wissinger, B., Farrar, G.J., et al. (2023). Whole genome sequencing for USH2A-associated disease reveals several pathogenic deep-intronic variants that are amenable to splice correction. *HGG Adv.* *4*, 100181. <https://doi.org/10.1016/j.xhgg.2023.100181>.
- de Bruijn, S.E., Fiorentino, A., Ottaviani, D., Fanucchi, S., Melo, U.S., Corral-Serrano, J.C., Mulders, T., Georgiou, M., Rivolta, C., Pontikos, N., et al. (2020). Structural Variants Create New Topological-Associated Domains and Ectopic Retinal Enhancer-Gene Contact in Dominant Retinitis Pigmentosa. *Am. J. Hum. Genet.* *107*, 802–814. <https://doi.org/10.1016/j.ajhg.2020.09.002>.

27. de Bruijn, S.E., Fadaie, Z., Cremers, F.P.M., Kremer, H., and Roosing, S. (2021). The Impact of Modern Technologies on Molecular Diagnostic Success Rates, with a Focus on Inherited Retinal Dystrophy and Hearing Loss. *Int. J. Mol. Sci.* 22, 2943. <https://doi.org/10.3390/ijms22062943>.
28. Den Hollander, A.I., Koenekoop, R.K., Yzer, S., Lopez, I., Arends, M.L., Voeselek, K.E.J., Zonneveld, M.N., Strom, T.M., Meitinger, T., Brunner, H.G., et al. (2006). Mutations in the CEP290 (NPHP6) gene are a frequent cause of leber congenital amaurosis. *Am. J. Hum. Genet.* 79, 556–561. <https://doi.org/10.1086/507318>.
29. Littink, K.W., Pott, J.-W.R., Collin, R.W.J., Kroes, H.Y., Verheij, J.B.G.M., Blokland, E.A.W., de Castro Miró, M., Hoyng, C.B., Klaver, C.C.W., Koenekoop, R.K., et al. (2010). A Novel Nonsense Mutation in CEP290 Induces Exon Skipping and Leads to a Relatively Mild Retinal Phenotype. *Invest. Ophthalmol. Vis. Sci.* 51, 3646–3652. <https://doi.org/10.1167/iov.09-5074>.
30. Webb, T.R., Parfitt, D.A., Gardner, J.C., Martinez, A., Bevilacqua, D., Davidson, A.E., Zito, I., Thiselton, D.L., Ressa, J.H.C., Aperi, M., et al. (2012). Deep intronic mutation in OFD1, identified by targeted genomic next-generation sequencing, causes a severe form of X-linked retinitis pigmentosa (RP23). *Hum. Mol. Genet.* 21, 3647–3654. <https://doi.org/10.1093/hmg/ddt194>.
31. Braun, T.A., Mullins, R.F., Wagner, A.H., Andorf, J.L., Johnston, R.M., Bakall, B.B., Deluca, A.P., Fishman, G.A., Lam, B.L., Weleber, R.G., et al. (2013). Non-exonic and synonymous variants in ABCA4 are an important cause of Stargardt disease. *Hum. Mol. Genet.* 22, 5136–5145. <https://doi.org/10.1093/hmg/ddt367>.
32. Rio Frio, T., McGee, T.L., Wade, N.M., Iseli, C., Beckmann, J.S., Berson, E.L., and Rivolta, C. (2009). A single-base substitution within an intronic repetitive element causes dominant retinitis pigmentosa with reduced penetrance. *Hum. Mutat.* 30, 1340–1347. <https://doi.org/10.1002/humu.21071>.
33. Vaché, C., Besnard, T., le Berre, P., García-García, G., Baux, D., Larrieu, L., Abadie, C., Blanchet, C., Bolz, H.J., Millan, J., et al. (2012). Usher syndrome type 2 caused by activation of an USH2A pseudodexon: Implications for diagnosis and therapy. *Hum. Mutat.* 33, 104–108. <https://doi.org/10.1002/humu.21634>.
34. Liguori, A., Vaché, C., Baux, D., Blanchet, C., Hamel, C., Malcolm, S., Koenig, M., Claustres, M., and Roux, A.-F. (2016). Whole USH2A Gene Sequencing Identifies Several New Deep Intronic Mutations. *Hum. Mutat.* 37, 184–193. <https://doi.org/10.1002/humu.22926>.
35. Baux, D., Vaché, C., Blanchet, C., Willems, M., Baudoin, C., Moclyn, M., Faugère, V., Touraine, R., Isidor, B., Dupin-Deguine, D., et al. (2017). Combined genetic approaches yield a 48% diagnostic rate in a large cohort of French hearing-impaired patients. *Sci. Rep.* 7, 16783. <https://doi.org/10.1038/s41598-017-16846-9>.
36. Khan, A.O., Becirovic, E., Betz, C., Neuhaus, C., Altmüller, J., Maria Riedmayr, L., Motameny, S., Nürnberg, G., Nürnberg, P., and Bolz, H.J. (2017). A deep intronic CLRN1 (USH3A) founder mutation generates an aberrant exon and underlies severe Usher syndrome on the Arabian Peninsula. *Sci. Rep.* 7, 1411. <https://doi.org/10.1038/s41598-017-01577-8>.
37. Mansard, L., Baux, D., Vaché, C., Blanchet, C., Meunier, I., Willems, M., Faugère, V., Baudoin, C., Moclyn, M., Bianchi, J., et al. (2021). The Study of a 231 French Patient Cohort Significantly Extends the Mutational Spectrum of the Two Major Usher Genes *MYO7A* and *USH2A*. *Int. J. Mol. Sci.* 22, 13294. <https://doi.org/10.3390/ijms222413294>.
38. Fadaie, Z., Whelan, L., Ben-Yosef, T., Dockery, A., Corradi, Z., Gilissen, C., Haer-Wigman, L., Corominas, J., Astuti, G.D.N., de Rooij, L., et al. (2021). Whole genome sequencing and in vitro splice assays reveal genetic causes for inherited retinal diseases. *NPJ Genom. Med.* 6, 97. <https://doi.org/10.1038/s41525-021-00261-1>.
39. Baux, D., Blanchet, C., Hamel, C., Meunier, I., Larrieu, L., Faugère, V., Vaché, C., Castorina, P., Puech, B., Bonneau, D., et al. (2014). Enrichment of LOVD-USHbases with 152 USH2A Genotypes Defines an Extensive Mutational Spectrum and Highlights Missense Hotspots. *Hum. Mutat.* 35, 1179–1186. <https://doi.org/10.1002/humu.22608>.
40. Slijkerman, R., Goloborodko, A., Broekman, S., de Vrieze, E., Hettterschijt, L., Peters, T., Gerits, M., Kremer, H., and van Wijk, E. (2018). Poor Splice-Site Recognition in a Humanized Zebrafish Knockin Model for the Recurrent Deep-Intronic c.7595-2144A>G Mutation in USH2A. *Zebrafish* 15, 597–609. <https://doi.org/10.1089/zeb.2018.1613>.
41. Dulla, K., Slijkerman, R., van Diepen, H.C., Albert, S., Dona, M., Beumer, W., Turunen, J.J., Chan, H.L., Schulkens, I.A., Vorthoren, L., et al. (2021). Antisense oligonucleotide-based treatment of retinitis pigmentosa caused by USH2A exon 13 mutations. *Mol. Ther.* 29, 2441–2455. <https://doi.org/10.1016/j.jymth.2021.04.024>.
42. Schellens, R., de Vrieze, E., Slijkerman, R., Kremer, H., and van Wijk, E. (2022). Generation of Humanized Zebrafish Models for the In Vivo Assessment of Antisense Oligonucleotide-Based Splice Modulation Therapies. *Methods Mol. Biol.* 2434, 281–299. [https://doi.org/10.1007/978-1-0716-2010-6\\_19](https://doi.org/10.1007/978-1-0716-2010-6_19).
43. Dreyer, B., Tranebjærg, L., Rosenberg, T., Weston, M.D., Kimberling, W.J., and Nilssen, Ø. (2000). Identification of novel USH2A mutations: implications for the structure of USH2A protein. *Eur. J. Hum. Genet.* 8, 500–506. <https://doi.org/10.1038/sj.ejhg.5200491>.
44. Eudy, J.D., Weston, M.D., Yao, S., Hoover, D.M., Rehm, H.L., Ma-Edmonds, M., Yan, D., Ahmad, I., Cheng, J.J., Ayuso, C., et al. (1998). Mutation of a gene encoding a protein with extracellular matrix motifs in Usher syndrome type IIa. *Science* 280, 1753–1757.
45. García-García, G., Aparisi, M.J., Jaijo, T., Rodrigo, R., Leon, A.M., Avila-fernandez, A., Blanco-kelly, F., Bernal, S., Navarro, R., Diaz-llopis, M., et al. (2011). Mutational Screening of the USH2A Gene in Spanish USH Patients Reveals 23 Novel Pathogenic Mutations, pp. 1–13.
46. Aller, E., Jaijo, T., Beneyto, M., Na, C., Oltra, S., Ayuso, C., Baiget, M., Carballo, M., Antin, G., Navea, A., et al. (2006). Identification of 14 novel mutations in the long isoform of USH2A in Spanish patients with Usher syndrome type II. *J. Med. Genet.* 43, e55. <https://doi.org/10.1136/jmg.2006.041764>.
47. Bernal, S., Medà, C., Solans, T., Ayuso, C., García-Sandoval, B., Valverde, D., Del Rio, E., and Baiget, M. (2005). Clinical and genetic studies in Spanish patients with Usher syndrome type II: description of new mutations and evidence for a lack of genotype-phenotype correlation. *Clin. Genet.* 68, 204–214. <https://doi.org/10.1111/j.1399-0004.2005.00481.x>.
48. Nájera, C., Beneyto, M., Blanca, J., Aller, E., Fontcuberta, A., Millán, J.M., and Ayuso, C. (2002). Mutations in Myosin VIIA ( MYO7A ) and Usherin ( USH2A ) in Spanish patients with usher syndrome types I and II, respectively. *Hum. Mutat.* 20, 76–77. <https://doi.org/10.1002/humu.9042>.
49. Varela, M.D., Bellingham, J., Motta, F., Jurkute, N., Ellingford, J.M., Quinodoz, M., Oprych, K., Niblock, M., Janeschitz-Kriegl, L., Kaminska, K., et al. (2022). Multi-disciplinary team directed analysis of whole genome sequencing reveals pathogenic non-coding variants in molecularly undiagnosed inherited retinal dystrophies. *Hum. Mol. Genet.* 32, 595–607. <https://doi.org/10.1093/hmg/ddac227>.
50. de Sousa Dias, M., Hernan, I., Delás, B., Pascual, B., Borrás, E., Gamundi, M.J., Mañé, B., Fernández-San José, P., Ayuso, C., and Carballo, M. (2015). New COL6A6 variant detected by whole-exome sequencing is linked to break points in intron 4 and 3'-UTR, deleting exon 5 of RHO, and causing adRP. *Mol. Vis.* 21, 857–870.
51. Chen, X., Liu, Y., Sheng, X., Tam, P.O.S., Zhao, K., Chen, X., Rong, W., Liu, Y., Liu, X., Pan, X., et al. (2014). PRPF4 mutations cause autosomal dominant retinitis pigmentosa. *Hum. Mol. Genet.* 23, 2926–2939. <https://doi.org/10.1093/hmg/ddu005>.
52. Coppieters, F., Todeschini, A.L., Fujimaki, T., Baert, A., De Bruyne, M., Van Cauwenbergh, C., Verdin, H., Bauwens, M., Ongenaert, M., Kondo, M., et al. (2015). Hidden Genetic Variation in LCA9-Associated Congenital Blindness Explained by 5'UTR Mutations and Copy-Number Variations of NMNAT1. *Hum. Mutat.* 36, 1188–1196. <https://doi.org/10.1002/humu.22899>.
53. Radziwon, A., Arno, G., K. Wheaton, D., McDonagh, E.M., Baple, E.L., Webb-Jones, K., G Birch, D., Webster, A.R., and MacDonald, I.M. (2017). Single-base substitutions in the CHM promoter as a cause of choroïderemia. *Hum. Mutat.* 38, 704–715. <https://doi.org/10.1002/humu.23212>.
54. Yang, Z., Huang, M., Wei, X., Sun, J., and Zhang, F. (2023). Case report: Compound heterozygous nonsense PCDH15 variant and a novel deep-intronic variant in a Chinese child with profound hearing loss. *Mol. Genet. Genomic Med.* 11, e2193. <https://doi.org/10.1002/mgg3.2193>.
55. Rodríguez-Muñoz, A., Aller, E., Jaijo, T., González-García, E., Cabrera-Peset, A., Gallego-Pinazo, R., Udaondo, P., Salom, D., García-García, G., and Millán, J.M. (2020). Expanding the Clinical and Molecular Heterogeneity of Nonsyndromic Inherited Retinal Dystrophies. *J. Mol. Diagnostics* 22, 532–543. <https://doi.org/10.1016/j.jmoldx.2020.01.003>.

56. Fuster-García, C., García-García, G., Jaijo, T., Blanco-Kelly, F., Tian, L., Hakonarson, H., Ayuso, C., Aller, E., and Millán, J.M. (2019). Expanding the Genetic Landscape of Usher-Like Phenotypes. *Investig. Ophthalmology Vis. Sci.* 60, 4701. <https://doi.org/10.1167/iovs.19-27470>.
57. Fuster-García, C., García-García, G., Jaijo, T., Fornés, N., Ayuso, C., Fernández-Burriel, M., Sánchez-De la Morena, A., Aller, E., and Millán, J.M. (2018). High-throughput sequencing for the molecular diagnosis of Usher syndrome reveals 42 novel mutations and consolidates CEP250 as Usher-like disease causative. *Sci. Rep.* 8, 17113. <https://doi.org/10.1038/s41598-018-35085-0>.
58. García Bohórquez, B., Aller, E., Rodríguez Muñoz, A., Jaijo, T., García García, G., and Millán, J.M. (2021). Updating the Genetic Landscape of Inherited Retinal Dystrophies. *Front. Cell Dev. Biol.* 9, 645600. <https://doi.org/10.3389/fcell.2021.645600>.
59. García-garcía, G., Aller, E., Jaijo, T., Aparisi, M.J., Larriou, L., Faugère, V., Ayuso, C., Roux, A., and Millán, J.M. (2014). Novel Deletions Involving the USH2A Gene in Patients with Usher Syndrome and Retinitis Pigmentosa. *Mol. Vis.* 106, 1398–1410.
60. Aparisi, M.J., Aller, E., Fuster-garcía, C., García-garcía, G., Rodrigo, R., Vázquez-manrique, R.P., Blanco-kelly, F., Ayuso, C., Roux, A., and Jaijo, T. (2014). Targeted next generation sequencing for molecular diagnosis of Usher syndrome. *Orphanet J Rare Dis.* 9, 168. <https://doi.org/10.1186/s13023-014-0168-7>.
61. Steele-Stallard, H.B., Le Quesne Stabej, P., Lenassi, E., Luxon, L.M., Claustres, M., Roux, A.-F., Webster, A.R., and Bitner-Glindzicz, M. (2013). Screening for duplications, deletions and a common intronic mutation detects 35% of second mutations in patients with USH2A monoallelic mutations on Sanger sequencing. *Orphanet J. Rare Dis.* 8, 122. <https://doi.org/10.1186/1750-1172-8-122>.
62. Krawitz, P.M., Schiska, D., Krüger, U., Appelt, S., Heinrich, V., Parkhomchuk, D., Timmermann, B., Millan, J.M., Robinson, P.N., Mundlos, S., et al. (2014). Screening for single nucleotide variants, small indels and exon deletions with a next-generation sequencing based gene panel approach for <sc>U</sc>sher syndrome. *Mol. Genet. Genomic Med.* 2, 393–401. <https://doi.org/10.1002/mgg3.92>.
63. Slijkerman, R.W., Vaché, C., Dona, M., García-García, G., Claustres, M., Heterschijt, L., Peters, T.A., Hartel, B.P., Pennings, R.J., Millan, J.M., et al. (2016). Antisense Oligonucleotide-based Splice Correction for USH2A-associated Retinal Degeneration Caused by a Frequent Deep-intronic Mutation. *Mol. Ther. Nucleic Acids* 5, e381. <https://doi.org/10.1038/mtna.2016.89>.
64. Cremers, F.P.M., Kimberling, W.J., Kulm, M., de Brouwer, A.P., van Wijk, E., te Brinke, H., Cremers, C.W.R.J., Hoefsloot, L.H., Banfi, S., Simonelli, F., et al. (2006). Development of a genotyping microarray for Usher syndrome. *J. Med. Genet.* 44, 153–160. <https://doi.org/10.1136/jmg.2006.044784>.
65. Zhang, X., Thompson, J.A., Zhang, D., Charng, J., Arunachalam, S., McLaren, T.L., Lamey, T.M., De Roach, J.N., Jennings, L., McLenachan, S., and Chen, F.K. (2020). Characterization of CRB1 splicing in retinal organoids derived from a patient with adult-onset rod-cone dystrophy caused by the c.1892A>G and c.2548G>A variants. *Mol. Genet. Genomic Med.* 8, e1489. <https://doi.org/10.1002/mgg3.1489>.
66. Buskin, A., Zhu, L., Chichagova, V., Basu, B., Mozaffari-Jovin, S., Dolan, D., Droop, A., Collin, J., Bronstein, R., Mehrotra, S., et al. (2018). Disrupted alternative splicing for genes implicated in splicing and ciliogenesis causes PRPF31 retinitis pigmentosa. *Nat. Commun.* 9, 4234. <https://doi.org/10.1038/s41467-018-06448-y>.
67. Jaganathan, K., Kyriazopoulou Panagiotopoulou, S., McRae, J.F., Darbandi, S.F., Knowles, D., Li, Y.I., Kosmicki, J.A., Arbelaez, J., Cui, W., Schwartz, G.B., et al. (2019). Predicting Splicing from Primary Sequence with Deep Learning. *Cell* 176, 535–548.e24. <https://doi.org/10.1016/j.cell.2018.12.015>.
68. Riepe, T.V., Khan, M., Roosing, S., Cremers, F.P.M., and 't Hoen, P.A.C. (2021). Benchmarking deep learning splice prediction tools using functional splice assays. *Hum. Mutat.* 42, 799–810. <https://doi.org/10.1002/humu.24212>.
69. Rowlands, C., Thomas, H.B., Lord, J., Wai, H.A., Arno, G., Beaman, G., Sergouniotis, P., Gomes-Silva, B., Campbell, C., Gossan, N., et al. (2021). Comparison of in silico strategies to prioritize rare genomic variants impacting RNA splicing for the diagnosis of genomic disorders. *Sci. Rep.* 11, 20607. <https://doi.org/10.1038/s41598-021-99747-2>.
70. Walker, L.C., Hoya, M.d.l., Wiggins, G.A.R., Lindy, A., Vincent, L.M., Parsons, M.T., Canson, D.M., Bis-Brewer, D., Cass, A., Tchourbanov, A., et al. (2023). Using the ACMG/AMP framework to capture evidence related to predicted and observed impact on splicing: Recommendations from the ClinGen SVI Splicing Subgroup. *Am. J. Hum. Genet.* 110, 1046–1067. <https://doi.org/10.1016/j.ajhg.2023.06.002>.
71. Fishilevich, S., Nudel, R., Rappaport, N., Hadar, R., Plaschkes, I., Iny Stein, T., Rosen, N., Kohn, A., Twik, M., Safran, M., et al. (2017). GeneHancer: genome-wide integration of enhancers and target genes in GeneCards. *Database* 2017, bax028. <https://doi.org/10.1093/database/bax028>.
72. Cherry, T.J., Yang, M.G., Harmin, D.A., Tao, P., Timms, A.E., Bauwens, M., Allikmets, R., Jones, E.M., Chen, R., De Baere, E., and Greenberg, M.E. (2020). Mapping the cis-regulatory architecture of the human retina reveals noncoding genetic variation in disease. *Proc. Natl. Acad. Sci. USA* 117, 9001–9012. <https://doi.org/10.1073/pnas.1922501117>.
73. Dueñas Rey, A., del Pozo Valero, M., Bouckaert, M., Wood, K.A., Van den Broeck, F., Daich Varela, M., Thomas, H.B., Van Heetvelde, M., De Bruyne, M., Van de Sompele, S., et al. (2024). Combining a prioritization strategy and functional studies nominates 5'UTR variants underlying inherited retinal disease. *Genome Med.* 16, 7. <https://doi.org/10.1186/s13073-023-01277-1>.
74. Santana, L.S., Reyes, A., Hoersch, S., Ferrero, E., Kolter, C., Gaulis, S., and Steinhäuser, S. (2024). Benchmarking tools for transcription factor prioritization. *Comput. Struct. Biotechnol. J.* 23, 2190–2199. <https://doi.org/10.1016/j.csbj.2024.05.016>.
75. Nishi, T., Kaneko, I., Iwanaga, S., and Yuda, M. (2024). PBarID-associated chromatin remodeling events are essential for gametocyte development in Plasmodium. *Nucleic Acids Res.* 52, 5624–5642. <https://doi.org/10.1093/nar/gkac207>.
76. Zhang, J., Wang, Q., Qi, S., Duan, Y., Liu, Z., Liu, J., Zhang, Z., and Li, C. (2024). An oncogenic enhancer promotes melanoma progression via regulating ETV4 expression. *J. Transl. Med.* 22, 547. <https://doi.org/10.1186/s12967-024-05356-8>.
77. Liu, H., Xu, J., Lan, Y., Lim, H.-W., and Jiang, R. (2021). The Scleraxis Transcription Factor Directly Regulates Multiple Distinct Molecular and Cellular Processes During Early Tendon Cell Differentiation. *Front. Cell Dev. Biol.* 9, 654397. <https://doi.org/10.3389/fcell.2021.654397>.
78. Mazzarotto, F., Olivotto, I., and Walsh, R. (2020). Advantages and Perils of Clinical Whole-Exome and Whole-Genome Sequencing in Cardiomyopathy. *Cardiovasc. Drugs Ther.* 34, 241–253. <https://doi.org/10.1007/s10557-020-06948-4>.
79. Carss, K.J., Arno, G., Erwood, M., Stephens, J., Sanchis-Juan, A., Hull, S., Megy, K., Grozeva, D., Dewhurst, E., Malka, S., et al. (2017). Comprehensive Rare Variant Analysis via Whole-Genome Sequencing to Determine the Molecular Pathology of Inherited Retinal Disease. *Am. J. Hum. Genet.* 100, 75–90. <https://doi.org/10.1016/j.ajhg.2016.12.003>.
80. Van Schil, K., Naessens, S., Van de Sompele, S., Carron, M., Aslanidis, A., Van Cauwenbergh, C., Kathrin Mayer, A., Van Heetvelde, M., Bauwens, M., Verdin, H., et al. (2018). Mapping the genomic landscape of inherited retinal disease genes prioritizes genes prone to coding and noncoding copy-number variations. *Genet. Med.* 20, 202–213. <https://doi.org/10.1038/gim.2017.97>.
81. Fadaie, Z., Neveling, K., Mantere, T., Derks, R., Haer-Wigman, L., den Ouden, A., Kwint, M., O'Gorman, L., Valkenburg, D., Hoyng, C.B., et al. (2021). Long-read technologies identify a hidden inverted duplication in a family with choroideremia. *HGG Adv.* 2, 100046. <https://doi.org/10.1016/j.xhgg.2021.100046>.
82. de Bruijn, S.E., Rodenburg, K., Corominas, J., Ben-Yosef, T., Reurink, J., Kremer, H., Whelan, L., Plomp, A.S., Berger, W., Farrar, G.J., et al. (2023). Optical genome mapping and revisiting short-read genome sequencing data reveal previously overlooked structural variants disrupting retinal disease-associated genes. *Genet. Med.* 25, 100345. <https://doi.org/10.1016/j.gim.2022.11.013>.
83. Stephenson, M.L., and Zamecnik, P.C. (1978). Inhibition of Rous sarcoma viral RNA translation by a specific oligodeoxyribonucleotide. *Proc. Natl. Acad. Sci. USA* 75, 285–288. <https://doi.org/10.1073/pnas.75.1.285>.
84. Merkle, T., Merz, S., Reautschnig, P., Blaha, A., Li, Q., Vogel, P., Wettengel, J., Li, J.B., and Stafforst, T. (2019). Precise RNA editing by recruiting endogenous ADARs with antisense oligonucleotides. *Nat. Biotechnol.* 37, 133–138. <https://doi.org/10.1038/s41587-019-0013-6>.
85. McClements, M.E., Barnard, A.R., Singh, M.S., Charbel Issa, P., Jiang, Z., Radu, R.A., and MacLaren, R.E. (2019). An AAV Dual Vector Strategy Ameliorates the

- Stargardt Phenotype in Adult *Abca4*  $-/-$  Mice. *Hum. Gene Ther.* 30, 590–600. <https://doi.org/10.1089/hum.2018.156>.
86. Girach, A., Audo, I., Birch, D.G., Huckfeldt, R.M., Lam, B.L., Leroy, B.P., Michaelides, M., Russell, S.R., Sallum, J.M.F., Stingl, K., et al. (2022). RNA-based therapies in inherited retinal diseases. *Ther. Adv. Ophthalmol.* 14, 25158414221134602. <https://doi.org/10.1177/25158414221134602>.
  87. Kurzawa-Akanbi, M., Tzoumas, N., Corral-Serrano, J.C., Guarascio, R., Steel, D.H., Cheetham, M.E., Armstrong, L., and Lako, M. (2024). Pluripotent stem cell-derived models of retinal disease: Elucidating pathogenesis, evaluating novel treatments, and estimating toxicity. *Prog. Retin. Eye Res.* 100, 101248. <https://doi.org/10.1016/j.preteyeres.2024.101248>.
  88. Havens, M.A., and Hastings, M.L. (2016). Splice-switching antisense oligonucleotides as therapeutic drugs. *Nucleic Acids Res.* 44, 6549–6563. <https://doi.org/10.1093/nar/gkw533>.
  89. Bennett, C.F. (2019). Therapeutic Antisense Oligonucleotides Are Coming of Age. *Annu. Rev. Med.* 70, 307–321. <https://doi.org/10.1146/annurev-med-041217-010829>.
  90. Seth, P.P., Tanowitz, M., and Bennett, C.F. (2019). Selective tissue targeting of synthetic nucleic acid drugs. *J. Clin. Invest.* 129, 915–925. <https://doi.org/10.1172/JCI125228>.
  91. Khvorova, A., and Watts, J.K. (2017). The chemical evolution of oligonucleotide therapies of clinical utility. *Nat. Biotechnol.* 35, 238–248. <https://doi.org/10.1038/nbt.3765>.
  92. Bennett, C.F., and Swayze, E.E. (2010). RNA Targeting Therapeutics: Molecular Mechanisms of Antisense Oligonucleotides as a Therapeutic Platform. *Annu. Rev. Pharmacol. Toxicol.* 50, 259–293. <https://doi.org/10.1146/annurev.pharmtox.010909.105654>.
  93. Yu, R.Z., Grundy, J.S., and Geary, R.S. (2013). Clinical pharmacokinetics of second generation antisense oligonucleotides. *Expert Opin. Drug Metabol. Toxicol.* 9, 169–182. <https://doi.org/10.1517/17425255.2013.737320>.
  94. Dulla, K., Aguila, M., Lane, A., Jovanovic, K., Parfitt, D.A., Schulken, I., Chan, H.L., Schmidt, I., Beumer, W., Vorthoren, L., et al. (2018). Splice-Modulating Oligonucleotide QR-110 Restores CEP290 mRNA and Function in Human c.2991+1655A>G LCA10 Models. *Mol. Ther. Nucleic Acids* 12, 730–740. <https://doi.org/10.1016/j.omtn.2018.07.010>.
  95. Garanto, A., Chung, D.C., Duijkers, L., Corral-Serrano, J.C., Messchaert, M., Xiao, R., Bennett, J., Vandenberghe, L.H., and Collin, R.W.J. (2016). In vitro and in vivo rescue of aberrant splicing in CEP290-associated LCA by antisense oligonucleotide delivery. *Hum. Mol. Genet.* 25, 2552–2563. <https://doi.org/10.1093/hmg/ddw118>.
  96. Aupy, P., Zarrouki, F., Sandro, Q., Gastaldi, C., Buclez, P.-O., Mamchaoui, K., Garcia, L., Vaillend, C., and Goyenvalle, A. (2020). Long-Term Efficacy of AAV9-U7snRNA-Mediated Exon 51 Skipping in *mdx52* Mice. *Mol. Ther. Methods Clin. Dev.* 17, 1037–1047. <https://doi.org/10.1016/j.omtm.2020.04.025>.
  97. Cideciyan, A.V., Jacobson, S.G., Drack, A.V., Ho, A.C., Charnig, J., Garafalo, A.V., Roman, A.J., Sumaroka, A., Han, I.C., Hochstedler, M.D., et al. (2019). Effect of an intravitreal antisense oligonucleotide on vision in Leber congenital amaurosis due to a photoreceptor cilium defect. *Nat. Med.* 25, 225–228. <https://doi.org/10.1038/s41591-018-0295-0>.
  98. Finkel, R.S., Mercuri, E., Darras, B.T., Connolly, A.M., Kuntz, N.L., Kirschner, J., Chiriboga, C.A., Saito, K., Servais, L., Tizzano, E., et al. (2017). Nusinersen versus Sham Control in Infantile-Onset Spinal Muscular Atrophy. *N. Engl. J. Med.* 377, 1723–1732. <https://doi.org/10.1056/NEJMoa1702752>.
  99. Li, D., Mastaglia, F.L., Fletcher, S., and Wilton, S.D. (2018). Precision Medicine through Antisense Oligonucleotide-Mediated Exon Skipping. *Trends Pharmacol. Sci.* 39, 982–994. <https://doi.org/10.1016/j.tips.2018.09.001>.
  100. Danecek, P., Bonfield, J.K., Liddle, J., Marshall, J., Ohan, V., Pollard, M.O., Whitwham, A., Keane, T., McCarthy, S.A., Davies, R.M., and Li, H. (2021). Twelve years of SAMtools and BCFtools. *GigaScience* 10, giab008. <https://doi.org/10.1093/gigascience/giab008>.
  101. Li, H., and Durbin, R. (2009). Fast and accurate short read alignment with Burrows–Wheeler transform. *Bioinformatics* 25, 1754–1760. <https://doi.org/10.1093/bioinformatics/btp324>.
  102. Kim, S., Scheffler, K., Halpern, A.L., Bekritsky, M.A., Noh, E., Källberg, M., Chen, X., Kim, Y., Beyter, D., Krusche, P., and Saunders, C.T. (2018). Strelka2: fast and accurate calling of germline and somatic variants. *Nat. Methods* 15, 591–594. <https://doi.org/10.1038/s41592-018-0051-x>.
  103. McLaren, W., Gil, L., Hunt, S.E., Riat, H.S., Ritchie, G.R.S., Thormann, A., Flicek, P., and Cunningham, F. (2016). The Ensembl Variant Effect Predictor. *Genome Biol.* 17, 122. <https://doi.org/10.1186/s13059-016-0974-4>.
  104. Johansson, L.F., van Dijk, F., de Boer, E.N., van Dijk-Bos, K.K., Jongbloed, J.D.H., van der Hout, A.H., Westers, H., Sinke, R.J., Swertz, M.A., Sijmons, R.H., and Sikkema-Raddatz, B. (2016). CoNVaDING: Single Exon Variation Detection in Targeted NGS Data. *Hum. Mutat.* 37, 457–464. <https://doi.org/10.1002/humu.22969>.
  105. Plagnol, V., Curtis, J., Epstein, M., Mok, K.Y., Stebbings, E., Grigoriadou, S., Wood, N.W., Hambleton, S., Burns, S.O., Thrasher, A.J., et al. (2012). A robust model for read count data in exome sequencing experiments and implications for copy number variant calling. *Bioinformatics* 28, 2747–2754. <https://doi.org/10.1093/bioinformatics/bts526>.
  106. Povysil, G., Tzika, A., Vogt, J., Haunschmid, V., Messiaen, L., Zschocke, J., Klambauer, G., Hochreiter, S., and Wimmer, K. (2017). panelcn.MOPS: Copy-number detection in targeted NGS panel data for clinical diagnostics. *Hum. Mutat.* 38, 889–897. <https://doi.org/10.1002/humu.23237>.
  107. Geoffroy, V., Lamouche, J.-B., Guignard, T., Nicaise, S., Kress, A., Scheidecker, S., Le Béche, A., and Muller, J. (2023). The AnnotSV webserver in 2023: updated visualization and ranking. *Nucleic Acids Res.* 51, W39–W45. <https://doi.org/10.1093/nar/gkad426>.
  108. Bottillo, I., De Luca, A., Schirinzi, A., Guida, V., Torrente, I., Calvieri, S., Gervasini, C., Larizza, L., Pizzuti, A., and Dallapiccola, B. (2007). Functional analysis of splicing mutations in exon 7 of NF1 gene. *BMC Med. Genet.* 8, 4. <https://doi.org/10.1186/1471-2350-8-4>.
  109. Sangermano, R., Bax, N.M., Bauwens, M., van den Born, L.L., De Baere, E., Garanto, A., Collin, R.W.J., Goercham-Ramlal, A.S.A., den Engelsman-van Dijk, A.H.A., Rohrschneider, K., et al. (2016). Photoreceptor Progenitor mRNA Analysis Reveals Exon Skipping Resulting from the ABCA4 c.5461-10T→C Mutation in Stargardt Disease. *Ophthalmology* 123, 1375–1385. <https://doi.org/10.1016/j.ophtha.2016.01.053>.
  110. Slijkerman, R., Kremer, H., and van Wijk, E. (2018). Antisense Oligonucleotide Design and Evaluation of Splice-Modulating Properties Using Cell-Based Assays. *Methods Mol. Biol.* 1828, 519–530. [https://doi.org/10.1007/978-1-4939-8651-4\\_34](https://doi.org/10.1007/978-1-4939-8651-4_34).
  111. Aartsma-Rus, A. (2012). Overview on AON Design. *Methods Mol. Biol.* 867, 117–129. [https://doi.org/10.1007/978-1-61779-767-5\\_8](https://doi.org/10.1007/978-1-61779-767-5_8).

## **Supplemental information**

### **Exploring non-coding variants and evaluation of antisense oligonucleotides for splicing redirection in Usher syndrome**

**Belén García-Bohórquez, Pilar Barberán-Martínez, Elena Aller, Teresa Jaijo, Pablo Mínguez, Cristina Rodilla, Lidia Fernández-Caballero, Fiona Blanco-Kelly, Carmen Ayuso, Alba Sanchis-Juan, Sanne Broekman, Erik de Vrieze, Erwin van Wijk, Gema García-García, and José M. Millán**

**Table S1. Studies performed in the selected patients.**

| Patient         | Family         | Gene                          | Dx                     | Allele 1                                                          | SS        | NGS       | SEG       | Reference                    |
|-----------------|----------------|-------------------------------|------------------------|-------------------------------------------------------------------|-----------|-----------|-----------|------------------------------|
| <b>RP-331</b>   | -              | <b>USH2A</b>                  | <b>ARRP</b>            | <b>c.2276G&gt;T; p.(Cys759Phe)</b>                                | <b>SP</b> | <b>NP</b> | <b>NA</b> | <sup>1</sup>                 |
| RPN-645         | FRPN-243       | <i>USH2A</i><br><i>CEP290</i> | ARRP                   | c.2276G>T; p.(Cys759Phe)<br>c.7394_7395del;<br>p.(Glu2465Valfs*2) | SP        | P1        | NA        | <sup>1</sup><br><sup>2</sup> |
| <b>RP-654</b>   | <b>FRP-30</b>  | <b>USH2A</b>                  | <b>USH</b>             | <b>c.11146C&gt;T; p.(Gln3716*)</b>                                | <b>SP</b> | <b>NP</b> | <b>NA</b> | <sup>3</sup>                 |
| RP-681          | FRP-49         | <i>CDH23</i>                  | USH                    | c.7279del; p.(Thr2427Leufs*47)                                    | NP        | P1        | NA        | <sup>4</sup>                 |
| RPN-803         | FRPN-372       | <i>USH2A</i><br><i>ZNF408</i> | ARRP                   | c.2276G>T; p.(Cys759Phe)<br>c.1534dup; p.(Arg512Profs*27)         | NP        | P1        | NA        | <sup>1</sup><br>This study   |
| RP-903          | FRP-57         | <i>USH2A</i>                  | USH                    | c.5039A>G; p.(Lys1680Arg)                                         | NP        | P2        | NA        | <sup>5</sup>                 |
| RP-904          | FRP-58         | <i>USH2A</i>                  | USH                    | c.9799T>C; p.(Cys3267Arg)                                         | SP        | NP        | NA        | <sup>6</sup>                 |
| RP-925          | -              | <i>USH2A</i>                  | USH                    | c.2276G>T; p.(Cys759Phe)                                          | SP        | NP        | NA        | <sup>1</sup>                 |
| RP-963          | FRP-140        | <i>USH2A</i>                  | USH                    | c.2276G>T; p.(Cys759Phe)                                          | SP        | NP        | NA        | <sup>1</sup>                 |
| RP-1036         | FRP-163        | <i>USH2A</i>                  | USH                    | c.2809+1G>A; p.(?)                                                | NP        | P1        | CC        | <sup>7</sup>                 |
| RP-1222         | FRP-228        | <i>USH1C</i>                  | USH                    | c.1234G>A; p.(Asp412Asn)                                          | NP        | P1        | NA        | <sup>4</sup>                 |
| RP-1360         | FRP-283        | <i>USH2A</i>                  | USH                    | c.2276G>T; p.(Cys759Phe)                                          | SP        | P1        | NA        | <sup>1</sup>                 |
| RP-1387         | FRP-320        | <i>PCDH15</i>                 | USH                    | c.3817C>A; p.(Arg1273Ser)                                         | NP        | P1        | NA        | This study                   |
| RP-1455         | FRP-337        | <i>USH2A</i>                  | USH                    | c.5666A>G; p.(Asp1889Gly)                                         | SP        | P1        | NA        | <sup>8</sup>                 |
| <b>RP-1472</b>  | <b>FRP-341</b> | <b>USH2A</b>                  | <b>USH</b>             | <b>c.2299del; p.(Glu767Serfs*21)</b>                              | <b>SP</b> | <b>NP</b> | <b>NA</b> | <sup>9</sup>                 |
| <b>RP-1485</b>  | <b>FRP-344</b> | <b>USH2A</b>                  | <b>USH</b>             | <b>c.1214del; p.(Asn405Ilefs*3)</b>                               | <b>SP</b> | <b>NP</b> | <b>NA</b> | <sup>10</sup>                |
| <b>RP-1494</b>  | <b>FRP-348</b> | <b>USH2A</b>                  | <b>USH</b>             | <b>c.2299del; p.(Glu767Serfs*21)</b>                              | <b>SP</b> | <b>NP</b> | <b>CC</b> | <sup>9</sup>                 |
| RP-1496         | FRP-350        | <i>ADGRV1</i>                 | USH                    | c.3443G>A; p.(Gly1148Asp)                                         | NP        | P1        | NA        | <sup>11</sup>                |
| RP-1541         | FRP-367        | <i>USH2A</i>                  | USH                    | c.12067-2A>G; p.?                                                 | SP        | NP        | NA        | <sup>12</sup>                |
| <b>RP-1569</b>  | <b>FRP-380</b> | <b>USH2A</b>                  | <b>USH</b>             | <b>c.2299del; p.(Glu767Serfs*21)</b>                              | <b>SP</b> | <b>NP</b> | <b>NA</b> | <sup>9</sup>                 |
| <b>RP-1595</b>  | <b>FRP-389</b> | <b>USH2A</b>                  | <b>USH</b>             | <b>c.10636G&gt;A; p.(Gly3546Arg)</b>                              | <b>SP</b> | <b>NP</b> | <b>NA</b> | <sup>13</sup>                |
| <b>RP-1596</b>  |                |                               |                        | <b>c.10636G&gt;A; p.(Gly3546Arg)</b>                              | <b>SP</b> | <b>NP</b> | <b>NA</b> |                              |
| RP-1600         | FRP-391        | <i>USH2A</i>                  | USH                    | c.1144G>A; p.(Gln5796*)                                           | SP        | P1        | NA        | <sup>13</sup>                |
| RP-1634         | FRP-410        | <i>ADGRV1</i>                 | USH                    | c.17386C>T; p.(Gln5796*)                                          | NP        | P1        | NA        | <sup>14</sup>                |
| RP-1635         | FRP-411        | <i>USH2A</i>                  | USH                    | c.2276G>T; p.(Cys759Phe)                                          | SP        | NP        | NA        | <sup>1</sup>                 |
| <b>RP-1647</b>  | <b>FRP-417</b> | <b>USH2A</b>                  | <b>ARRP</b>            | <b>c.2276G&gt;T; p.(Cys759Phe)</b>                                | <b>SP</b> | <b>NP</b> | <b>NA</b> | <sup>1</sup>                 |
| RP-1716         | FRP-437        | <i>USH2A</i>                  | USH                    | c.5858C>G; p.(Ala1953Gly)                                         | SP        | P1        | NA        | <sup>15</sup>                |
| RP-1726         | FRP-448        | <i>USH2A</i>                  | USH                    | c.13514A>G; p.(Tyr4505Cys)                                        | SP        | NP        | NA        | <sup>16</sup>                |
| RP-1727         | FRP-449        | <i>USH2A</i>                  | USH                    | c.1214del; p.(Asn405Ilefs*3)                                      | SP        | NP        | NA        | <sup>10</sup>                |
| RP-1728         | FRP-446        | <i>USH2A</i>                  | USH                    | c.13514A>G; p.(Tyr4505Cys)                                        | SP        | NP        | NA        | <sup>16</sup>                |
| RP-1736         | FRP-455        | <i>USH2A</i>                  | USH                    | c.2299del; p.(Glu767Serfs*21)                                     | SP        | NP        | NA        | <sup>9</sup>                 |
| <b>RP-1741#</b> | <b>FRP-460</b> | <b>USH2A</b>                  | <b>USH</b>             | <b>c.7595-2144A&gt;G;<br/>p.(Lys2532Thrfs*56)</b>                 | <b>SP</b> | <b>P1</b> | <b>NA</b> | <sup>3</sup>                 |
| <b>RP-1776</b>  | <b>FRP-484</b> | <b>USH2A</b>                  | <b>ARRP<br/>+ SNHL</b> | <b>c.2276G&gt;T; p.(Cys759Phe)</b>                                | <b>SP</b> | <b>NP</b> | <b>NA</b> | <sup>1</sup>                 |
| RP-1815         | FRP-505        | <i>USH2A</i>                  | USH                    | c.908G>A; p.(Arg303His)                                           | NP        | P2        | CC        | <sup>17</sup>                |
| RP-1943         | FRP-566        | <i>USH2A</i>                  | ARRP                   | c.2276G>T; p.(Cys759Phe)                                          | SP        | P1        | NA        | <sup>1</sup>                 |
| RP-1950         | FRP-568        | <i>USH2A</i>                  | USH                    | c.2299del; p.(Glu767Serfs*21)                                     | SP        | P1        | NA        | <sup>9</sup>                 |
| RP-1953         | FRP-570        | <i>USH1C</i>                  | USH                    | c.1859G>T; p.(Arg620Leu)                                          | NP        | P1        | NA        | <sup>18</sup>                |
| RP-1994         | FRP-585        | <i>USH2A</i>                  | ARRP                   | c.2299del; p.(Glu767Serfs*21)                                     | SP        | P1        | NA        | <sup>9</sup>                 |



|                |                |                              |            |                                                |           |           |           |                  |
|----------------|----------------|------------------------------|------------|------------------------------------------------|-----------|-----------|-----------|------------------|
| RP-2034        | FRP-614        | <i>USH2A</i>                 | USH        | c.2299del; p.(Glu767Serfs*21)                  | SP        | P1        | CC        | 9                |
| <b>RP-2055</b> | <b>FRP-619</b> | <b><i>USH2A</i></b>          | <b>USH</b> | <b>c.8435_8438del;<br/>p.(Thr2812Metfs*17)</b> | <b>SP</b> | <b>NP</b> | <b>NA</b> | 19               |
| RP-2106        | FRP-645        | <i>USH2A</i>                 | USH        | c.5933C>T; p.(Pro1978Leu)                      | SP        | NP        | NA        | This study       |
| RP-2131        | FRP-667        | <i>MYO7A</i>                 | USH        | c.3G>A; p.(?)                                  | NP        | P1        | NA        | 4                |
| RP-2140        | FRP-676        | <i>CDH23</i>                 | USH        | c.6393del; p.(Ile2132Serfs*11)                 | NP        | P1        | NA        | 20               |
| RP-2159        | FRP-675        | <i>USH2A</i>                 | USH        | c.3637_3642dup;<br>p.(Phe1213_Alal214dup)      | SP        | P1        | NA        | This study       |
| RP-2213        | FRP-719        | <i>MYO7A</i>                 | ARRP       | c.640G>A; p.(Gly214Arg)                        | NP        | P1        | NA        | 21               |
| RP-2214        | FRP-720        | <i>USH2A</i>                 | ARRP       | c.2431_2432del;<br>p.(Lys811Aspfs*11)          | NP        | P1        | NA        | 6                |
| <b>RP-2224</b> | <b>FRP-722</b> | <b><i>USH2A</i></b>          | <b>USH</b> | <b>c.2431_2432del;<br/>p.(Lys811Aspfs*11)</b>  | <b>SP</b> | <b>NP</b> | <b>NA</b> | 6                |
| RP-2232        | FRP-722        | <i>USH2A</i>                 | USH        | c.1898C>A; p.(Ser633*)                         | SP        | P1        | NA        | 7                |
| RP-2237        | FRP-724        | <i>USH2A</i>                 | ARRP       | c.12575G>A; p.(Arg4192His)                     | SP        | NP        | NA        | 22               |
| RP-2238        | FRP-725        | <i>USH2A</i><br><i>PDE6H</i> | ARRP       | c.1724G>A; p.(Cys575Tyr)<br>c.134+2T>C; p.(?)  | SP        | NP        | NA        | 23<br>This study |
| RP-2239        | FRP-726        | <i>USH2A</i>                 | ARRP       | c.7061G>A; p.(Arg2354His)                      | SP        | P1        | NA        | This study       |
| RP-2241        | FRP-728        | <i>USH2A</i>                 | ARRP       | c.2276G>T; p.(Cys759Phe)                       | SP        | NP        | NA        | 1                |
| RP-2262        | FRP-730        | <i>ADGRV1</i>                | USH        | c.1875G>A; p.(Asp6252Asn)                      | NP        | P1        | NA        | This study       |
| RP-2264        | FRP-732        | <i>USH2A</i>                 | USH        | c.1055C>T; p.(Thr352Ile)                       | SP        | P2        | NA        | 24               |
| RP-2266        | FRP-734        | <i>USH2A</i>                 | USH        | c.9799T>C; p.(Cys3267Arg)                      | SP        | NP        | NA        | 6                |
| RP-2268        | FRP-736        | <i>USH2A</i>                 | ARRP       | c.10073G>A; p.(Cys3358Tyr)                     | NP        | P2        | NA        | 15               |
| RP-2269        | FRP-737        | <i>USH2A</i>                 | ARRP       | c.1214del; p.(Asn405Ilefs*3)                   | NP        | P2        | NA        | 10               |
| RP-2270        | FRP-738        | <i>USH2A</i>                 | ARRP       | c.12574C>T; p.(Arg4192Cys)                     | NP        | P2        | NA        | 25               |
| RP-2275        | FRP-740        | <i>USH2A</i>                 | USH        | c.5776+1G>A; p.(?)                             | SP        | P1        | NA        | 26               |

Homozygous and heterozygous patients for deep-intronic variants in *USH2A* are highlighted in bold. RP/RPN: Patient number; "-": Unknown; RP/FRPN: Family number; Dx: Diagnosis; ARRP: Autosomal Recessive Retinitis Pigmentosa; USH: Usher Syndrome; SS: Sanger Screening; SP: Screening Performed; NP: Not Performed; P1: Panel design one; P2: Panel design two; SEG: Segregation analysis. The “#” symbol refers to the NGS positive control; CC: cosegregation confirmed.

**Table S2. Sequence of antisense oligonucleotides tested for the aberrant splicing modulation caused by three deep-intronic variants.**

| Variant                        | Oligonucleotide | Sequence (3'-5')       | G-C% |
|--------------------------------|-----------------|------------------------|------|
| <i>USH2A</i> : c.14134-3169A>G | AON1-PE64       | CCAUUUUUCUAGGAGAAGCCC  | 47.6 |
|                                | AON2-PE64       | CAACUGUUUGUUCACAAGGU   | 40   |
| <i>USH2A</i> : c.9958+3438A>G  | AON1-PE50       | UGCAGGUGUAAAAAUGGCCAAG | 45.5 |
|                                | AON7-PE50       | UACCUUGACUGGAGUGAUCUC  | 47.6 |
| <i>USH2A</i> : c.8681+3960A>G  | AON1-PE43       | CAGUGACAAUUUGGAUGGAGAC | 45.5 |

G-C: Guanine-Cytosine content.

**Table S3. Primer sequences used for the minigene assays**

| Variant                       | Restriction enzyme | Restriction site and tails | Primer sequence (5'-3') |
|-------------------------------|--------------------|----------------------------|-------------------------|
| <i>USH2A</i> : c.4106C>T      | XhoI               | AAGAATCTCGAG               | gggaaatccagtacatcacc    |
|                               | NheI               | AAGAATGCTAGC               | caatatacaactgagtgtggac  |
| <i>USH2A</i> : c.5168-26A>C   | XhoI               | AAGAATCTCGAG               | cactgcctctatatttacag    |
|                               | NheI               | AAGAATGCTAGC               | catctgaaggagatggaac     |
| <i>USH2A</i> : c.9958+3438A>G | XhoI               | AAGAATCTCGAG               | cctgtactatgactaaccag    |
|                               | NheI               | AAGAATGCTAGC               | ggtgttctgacttctcttc     |
| <i>USH2A</i> : c.8681+3960A>G | NdeI               | AAGAATCATATG               | gaagctgccgaagtgagtc     |
|                               | NheI               | AAGAATGCTAGC               | gaacacgtgtcatggaactg    |

**RP-1036 (FRP-163)**

*USH2A*: c.2809+1G>A / **c.8681+3960A>G**

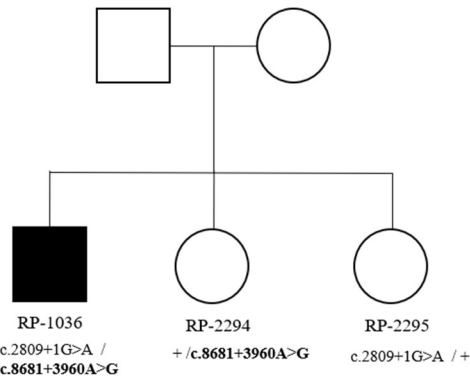

**RP-1494 (FRP-348)**

*USH2A*: **c.14134-3169A>G** / c.2299delG

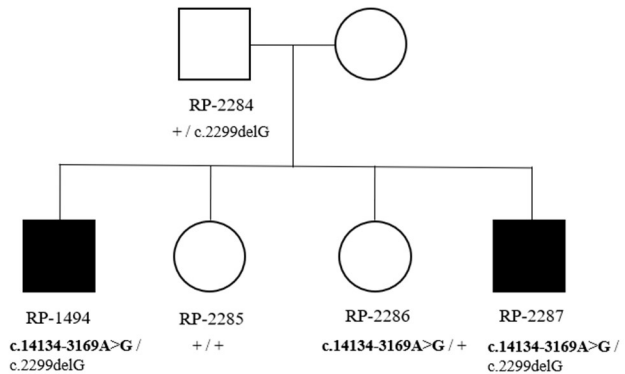

**RP-2034 (FRP-614)**

*USH2A*: c.2299delG / **c.5168-26A>C**

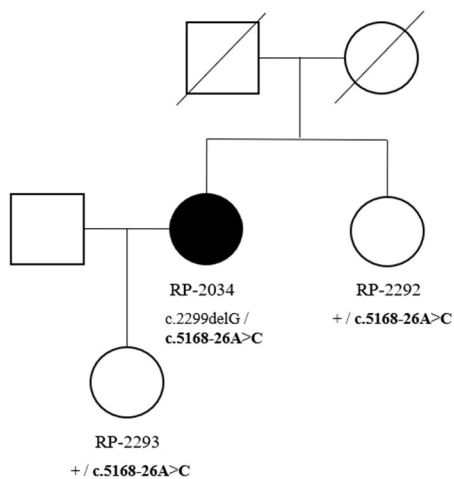

**RP-1815 (FRP-505)**

*USH2A*: c.908G>A / **c.9958+3438A>G**

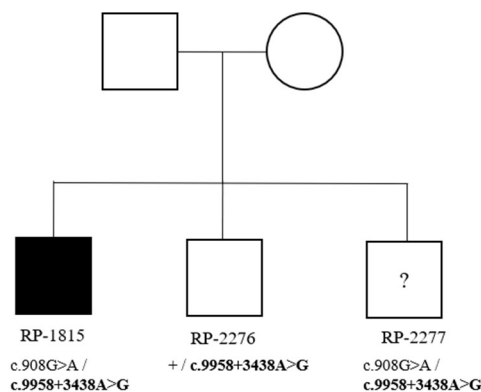

**Figure S1. Family pedigrees in which segregation analysis were assessed. Variants identified in this study are highlighted in bold.**

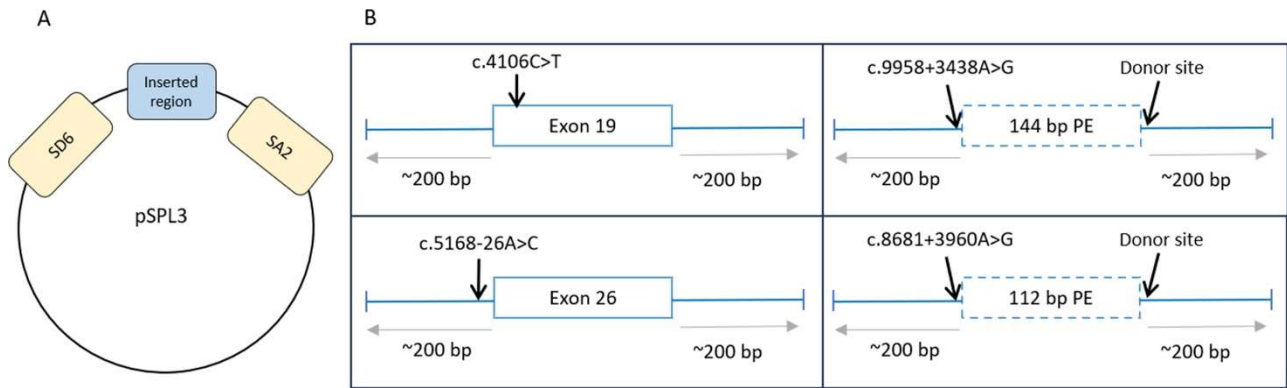

**Figure S2. Minigene constructs for the analysis of *USH2A* variants.** Regions inserted are depicted in blue in both sections A and B. In section A, constitutive exons are represented in yellow (SD6 and SA2). Each square in section B represents designs performed for each variant. PE: Pseudoexon; bp: base pair.

#### SUPPLEMENTAL REFERENCES

1. Dreyer, B., Tranebjærg, L., Rosenberg, T., Weston, M.D., Kimberling, W.J., and Nilssen, Ø. (2000). Identification of novel *USH2A* mutations: implications for the structure of *USH2A* protein. *Eur. J. Hum. Genet.* 8, 500–506. <https://doi.org/10.1038/sj.ejhg.5200491>.
2. Nishiguchi, K.M., and Rivolta, C. (2012). Genes Associated with Retinitis Pigmentosa and Allied Diseases Are Frequently Mutated in the General Population. *PLoS One* 7, e41902. <https://doi.org/10.1371/journal.pone.0041902>.
3. Vaché, C., Besnard, T., le Berre, P., García-García, G., Baux, D., Larrieu, L., Abadie, C., Blanchet, C., Bolz, H.J., Millan, J., et al. (2012). Usher syndrome type 2 caused by activation of an *USH2A* pseudoexon: Implications for diagnosis and therapy. *Hum. Mutat.* 33, 104–108. <https://doi.org/10.1002/humu.21634>.
4. Fuster-García, C., García-García, G., Jaijo, T., Fornés, N., Ayuso, C., Fernández-Burriel, M., Sánchez-De la Morena, A., Aller, E., and Millán, J.M. (2018). High-throughput

- sequencing for the molecular diagnosis of Usher syndrome reveals 42 novel mutations and consolidates CEP250 as Usher-like disease causative. *Sci. Rep.* 8, 17113. <https://doi.org/10.1038/s41598-018-35085-0>.
5. Costa, K.A., Salles, M.V., Whitebirch, C., Chiang, J., and Sallum, J.M.F. (2017). Gene panel sequencing in Brazilian patients with retinitis pigmentosa. *Int. J. Retin. Vitre.* 3, 33. <https://doi.org/10.1186/s40942-017-0087-6>.
  6. Nájera, C., Beneyto, M., Blanca, J., Aller, E., Fontcuberta, A., Millán, J.M., and Ayuso, C. (2002). Mutations in Myosin VIIA ( MYO7A ) and Usherin ( USH2A ) in Spanish patients with usher syndrome types I and II, respectively. *Hum. Mutat.* 20, 76–77. <https://doi.org/10.1002/humu.9042>.
  7. Baux, D., Blanchet, C., Hamel, C., Meunier, I., Larrieu, L., Faugère, V., Vaché, C., Castorina, P., Puech, B., Bonneau, D., et al. (2014). Enrichment of LOVD-USHbases with 152 USH2A Genotypes Defines an Extensive Mutational Spectrum and Highlights Missense Hotspots. *Hum. Mutat.* 35, 1179–1186. <https://doi.org/10.1002/humu.22608>.
  8. Perea-Romero, I., Gordo, G., Iancu, I.F., Del Pozo-Valero, M., Almoguera, B., Blanco-Kelly, F., Carreño, E., Jimenez-Rolando, B., Lopez-Rodriguez, R., Lorda-Sanchez, I., et al. (2021). Genetic landscape of 6089 inherited retinal dystrophies affected cases in Spain and their therapeutic and extended epidemiological implications. *Sci. Rep.* 11, 1526. <https://doi.org/10.1038/s41598-021-81093-y>.
  9. Eudy, J.D., Weston, M.D., Yao, S., Hoover, D.M., Rehm, H.L., Ma-Edmonds, M., Yan, D., Ahmad, I., Cheng, J.J., Ayuso, C., et al. (1998). Mutation of a gene encoding a protein with extracellular matrix motifs in Usher syndrome type IIa. *Science* 280, 1753–1757.
  10. Bernal, S., Medà, C., Solans, T., Ayuso, C., Garcia-Sandoval, B., Valverde, D., Del Rio, E., and Baiget, M. (2005). Clinical and genetic studies in Spanish patients with Usher syndrome type II: description of new mutations and evidence for a lack of genotype-

- phenotype correlation. *Clin. Genet.* 68, 204–214. <https://doi.org/10.1111/j.1399-0004.2005.00481.x>.
11. Wang, J., Zhang, V.W., Feng, Y., Tian, X., Li, F.Y., Truong, C., Wang, G., Chiang, P.W., Lewis, R.A., and Wong, L.J.C. (2014). Dependable and efficient clinical utility of target capture-based deep sequencing in molecular diagnosis of retinitis pigmentosa. *Investig. Ophthalmol. Vis. Sci.* 55, 6213–6223. <https://doi.org/10.1167/iovs.14-14936>.
  12. Rivolta, C., Sweklo, E.A., Berson, E.L., and Dryja, T.P. (2000). Report Missense Mutation in the USH2A Gene: Association with Recessive Retinitis Pigmentosa without Hearing Loss. *Am. J. Hum. Genet* 66, 1975–1978. <https://doi.org/10.1086/302926>.
  13. Garcia-Garcia, G., Aparisi, M.J., Jaijo, T., Rodrigo, R., Leon, A.M., Avila-fernandez, A., Blanco-kelly, F., Bernal, S., Navarro, R., Diaz-llopis, M., et al. (2011). Mutational screening of the USH2A gene in Spanish USH patients reveals 23 novel pathogenic mutations. 1–13.
  14. García-García, G., Besnard, T., Baux, D., Vaché, C., Aller, E., Malcolm, S., Claustres, M., Millan, J.M., and Roux, A.-F. (2013). The contribution of GPR98 and DFNB31 genes to a Spanish Usher syndrome type 2 cohort. *Mol. Vis.* 19, 367–373.
  15. McGee, T.L., Seyedahmadi, B.J., Sweeney, M.O., Dryja, T.P., and Berson, E.L. (2010). Novel mutations in the long isoform of the USH2A gene in patients with Usher syndrome type II or non-syndromic retinitis pigmentosa. *J. Med. Genet.* 47, 499–506. <https://doi.org/10.1136/jmg.2009.075143>.
  16. Zampaglione, E., Kinde, B., Place, E.M., Navarro-Gomez, D., Maher, M., Jamshidi, F., Nassiri, S., Mazzone, J.A., Finn, C., Schlegel, D., et al. (2020). Copy-number variation contributes 9% of pathogenicity in the inherited retinal degenerations. *Genet. Med.* 22, 1079–1087. <https://doi.org/10.1038/s41436-020-0759-8>.
  17. Yan, D., Ouyang, X., Patterson, D.M., Du, L.L., Jacobson, S.G., and Liu, X.-Z. (2009).

- Mutation analysis in the long isoform of USH2A in American patients with Usher Syndrome type II. *J. Hum. Genet.* 54, 732–738. <https://doi.org/10.1038/jhg.2009.107>.
18. Bonnet, C., Riahi, Z., Chantot-bastaraud, S., Smagghe, L., Letexier, M., Marcaillou, C., Lefèvre, G.M., Hardelin, J., El-amraoui, A., Singh-estivalet, A., et al. (2016). An innovative strategy for the molecular diagnosis of Usher syndrome identifies causal biallelic mutations in 93 % of European patients. 1730–1738. <https://doi.org/10.1038/ejhg.2016.99>.
  19. Aller, E., Jaijo, T., Beneyto, M., Na, C., Oltra, S., Ayuso, C., Baiget, M., Carballo, M., Antin, G., Navea, A., et al. (2006). Identification of 14 novel mutations in the long isoform of. 1–5. <https://doi.org/10.1136/jmg.2006.041764>.
  20. Oshima, A., Jaijo, T., Aller, E., Millan, J.M., Carney, C., Usami, S., Moller, C., and Kimberling, W.J. (2008). Mutation profile of the CDH23 gene in 56 probands with Usher syndrome type I. *Hum. Mutat.* 29, E37–E46. <https://doi.org/10.1002/humu.20761>.
  21. Adato, A., Weiv, D., Kalinski, H., Ayadi, H., Petit, C., and Korostishevsky, M. (1997). Mutation Profile of All 49 Exons of the Human Myosin VIIA Gene , and Haplotype Analysis , in Usher 1 B Families from Diverse Origins. 813–821.
  22. Ávila-Fernández, A., Cantalapiedra, D., Aller, E., Vallespín, E., Aguirre-Lambán, J., Blanco-Kelly, F., Corton, M., Riveiro-Álvarez, R., Allikmets, R., Trujillo-Tiebas, M.J., et al. (2010). Mutation analysis of 272 Spanish families affected by autosomal recessive retinitis pigmentosa using a genotyping microarray. *Mol. Vis.* 16, 2550–2558. <https://doi.org/272> [pii].
  23. Bonnet, C., Grati, M., Marlin, S., Levilliers, J., Hardelin, J.P., Parodi, M., Niasme-Grare, M., Zelenika, D., Délépine, M., Feldmann, D., et al. (2011). Complete exon sequencing of all known Usher syndrome genes greatly improves molecular diagnosis. *Orphanet J. Rare Dis.* 6, 21. <https://doi.org/10.1186/1750-1172-6-21>.

24. Baux, D., Larrieu, L., Blanchet, C., Hamel, C., Ben Salah, S., Vielle, A., Gilbert-Dussardier, B., Holder, M., Calvas, P., Philip, N., et al. (2007). Molecular and in silico analyses of the full-length isoform of usherin identify new pathogenic alleles in Usher type II patients. *Hum. Mutat.* 28, 781–789. <https://doi.org/10.1002/humu.20513>.
25. Corton, M., Tatu, S.D., Avila-Fernandez, A., Vallespín, E., Tapias, I., Cantalapiedra, D., Blanco-Kelly, F., Riveiro-Alvarez, R., Bernal, S., García-Sandoval, B., et al. (2013). High frequency of CRB1 mutations as cause of Early-Onset Retinal Dystrophies in the Spanish population. *Orphanet J. Rare Dis.* 8. <https://doi.org/10.1186/1750-1172-8-20>.
26. Sandberg, M.A., Rosner, B., Weigel-DiFranco, C., McGee, T.L., Dryja, T.P., and Berson, E.L. (2008). Disease Course in Patients with Autosomal Recessive Retinitis Pigmentosa due to the USH2A Gene. *Investig. Ophthalmology Vis. Sci.* 49, 5532. <https://doi.org/10.1167/iovs.08-2009>.
